# Supplementary material for: Secretome Survey of Human Plexiform Neurofibroma Derived Schwann Cells Reveals a Secreted form of the RARRES1 Protein
Source: MDPI journal article supplement (doi:10.3390/ijms13079380), 2012-07-24
Supplement: s1 [file s1]

## Sheet: Sheet1
	Supplemental Table: List of proteins identified in the conditioned media of normal (NSC) and plexiform nuerofibroma (NFSCs) Schwann cells cultures. Numbers represent sepectral count for each protein across the two NSC and the four NFSCs cultures analyzed along with avegare spectral count for each group labled as Av (NSCs) and Av (NFSCs). Numbers in column "K" represent log (2) ratio of avrerage v…
accession	description	NSC1	NSC2	Av (NSC)	NFSC141	NFSC142	NFSC143L	NFSC143R	Av (NFSCs)	Ratio (NFSC/NSC)	p value	sNF96.2
Q7Z7G0	Target of Nesh-SH3	1	1	1	29	3	21	21	18.5	18.5	0.05	15
P02649	Apolipoprotein E	0	1	0.5	0	22	2	5	7.25	14.5	0.2403	19
P05155	Plasma protease C1 inhibitor	6	7	6.5	112	103	63	60	84.5	13	0.0179	18
P78371	T-complex protein 1 subunit beta	1	0	0.5	1	1	20	0	5.5	11	0.4533	3
P98160	Basement membrane-specific heparan sulfate proteoglycan	5	5	5	20	21	94	44	44.75	8.95	0.0603	30
P22692	Insulin-like growth factor-binding protein 4	3	0	1.5	9	15	9	17	12.5	8.33333	0.0603	14
Q16363	Laminin subunit alpha-4	13	13	13	122	43	89	68	80.5	6.19231	0.0274	31
P07585	Decorin	11	12	11.5	71	25	83	87	66.5	5.78261	0.0641	249
Q9Y230	RuvB-like 2	1	1	1	4	0	12	5	5.25	5.25	0.3476	8
P09871	Complement C1s subcomponent	5	5	5	24	29	9	40	25.5	5.1	0.0603	58
P63220	40S ribosomal protein S21	1	0	0.5	2	2	4	2	2.5	5	0.0491	3
Q9UKY7	Protein CDV3 homolog	1	0	0.5	3	0	5	1	2.25	4.5	0.3404	0
P01023	Alpha-2-macroglobulin	22	22	22	115	87	69	112	95.75	4.35227	0.0603	45
Q92520	Protein FAM3C	1	1	1	0	1	12	4	4.25	4.25	0.6228	8
Q16222	UDP-N-acetylhexosamine pyrophosphorylase	2	2	2	12	0	17	3	8	4	0.3476	0
P30085	UMP-CMP kinase	1	1	1	2	2	10	2	4	4	0.0455	4
P24592	Insulin-like growth factor-binding protein 6	4	4	4	20	15	9	19	15.75	3.9375	0.0181	25
P41222	Prostaglandin-H2 D-isomerase	4	4	4	8	31	6	16	15.25	3.8125	0.0603	0
P35556	Fibrillin-2	1	1	1	1	1	8	5	3.75	3.75	0.2733	0
P07093	Glia-derived nexin	11	12	11.5	28	0	94	47	42.25	3.67391	0.3545	16
P53396	ATP-citrate synthase	6	5	5.5	11	0	66	1	19.5	3.54545	1	7
P00736	Complement C1r subcomponent	6	6	6	9	29	10	31	19.75	3.29167	0.0603	46
P15880	40S ribosomal protein S2	1	1	1	5	0	8	0	3.25	3.25	1	0
Q96CX2	BTB/P	1	1	1	6	1	6	0	3.25	3.25	0.6171	3
Q14112	Nidogen-2	25	25	25	116	44	77	85	80.5	3.22	0.0331	88
O43852	Calumenin	9	11	10	34	1	55	38	32	3.2	0.3545	119
O15145	Actin-related protein 2/3 complex subunit 3	2	0	1	0	2	5	5	3	3	0.3329	0
P07225	Vitamin K-dependent protein S	3	3	3	7	0	17	9	8.25	2.75	0.3476	0
P05198	Eukaryotic translation initiation factor 2 subunit 1	1	1	1	2	0	7	2	2.75	2.75	0.3404	2
P45877	Peptidyl-prolyl cis-trans isomerase C	1	1	1	1	3	4	3	2.75	2.75	0.1336	0
Q07954	Prolow-density lipoprotein receptor-related protein 1	12	12	12	19	23	43	44	32.25	2.6875	0.0603	8
P02786	Transferrin receptor protein 1	5	0	2.5	14	0	12	0	6.5	2.6	0.6228	0
P24043	Laminin subunit alpha-2	12	12	12	10	36	35	40	30.25	2.52083	0.3476	9
P01033	Metalloproteinase inhibitor 1	15	16	15.5	57	12	43	44	39	2.51613	0.3545	61
P17931	Galectin-3	5	5	5	5	11	20	14	12.5	2.5	0.14	0
P62906	60S ribosomal protein L10a	1	2	1.5	8	0	7	0	3.75	2.5	1	0
P60981	Destrin	1	1	1	1	1	6	2	2.5	2.5	0.2733	4
O60565	Gremlin-1	2	0	1	3	0	3	4	2.5	2.5	0.2333	0
P05204	Non-histone chromosomal protein HMG-17	1	0	0.5	0	2	1	2	1.25	2.5	0.3329	7
P07996	Thrombospondin-1	10	10	10	6	11	49	33	24.75	2.475	0.3476	7
P04792	Heat shock protein beta-1	6	6	6	7	4	40	8	14.75	2.45833	0.3476	7
P04179	Superoxide dismutase [Mn], mitochondrial	3	3	3	6	4	7	12	7.25	2.41667	0.0603	9
P49327	Fatty acid synthase	5	5	5	8	0	38	0	11.5	2.3	1	6
Q9HAT2	Sialate	2	3	2.5	2	6	2	13	5.75	2.3	0.6228	0
P08603	Complement factor H	6	6	6	26	4	11	13	13.5	2.25	0.3476	0
P31431	Syndecan-4	3	3	3	20	0	5	2	6.75	2.25	1	3
O14558	Heat shock protein beta-6	2	2	2	0	2	14	2	4.5	2.25	1	0
P05386	60S acidic ribosomal protein P1	1	1	1	1	1	5	2	2.25	2.25	0.2733	0
P14543	Nidogen-1	26	27	26.5	76	19	45	93	58.25	2.19811	0.3545	10
P00491	Purine nucleoside phosphorylase	10	10	10	25	4	35	21	21.25	2.125	0.3476	8
Q76M96	Coiled-coil domain-containing protein 80	4	4	4	5	0	25	4	8.5	2.125	0.6228	0
Q99574	Neuroserpin	2	2	2	8	0	5	4	4.25	2.125	0.3476	0
Q9Y2B0	Protein canopy homolog 2	2	2	2	4	2	5	6	4.25	2.125	0.14	5
P10124	Serglycin	21	22	21.5	90	3	59	30	45.5	2.11628	0.3545	0
Q15582	Transforming growth factor-beta-induced protein ig-h3	23	25	24	19	25	85	69	49.5	2.0625	0.4811	62
P11047	Laminin subunit gamma-1	37	37	37	106	35	93	68	75.5	2.04054	0.3476	45
Q9BRK5	45 kDa calcium-binding protein	9	9	9	16	2	24	31	18.25	2.02778	0.3476	20
Q13162	Peroxiredoxin-4	5	5	5	7	6	15	12	10	2	0.0603	6
P62249	40S ribosomal protein S16	3	4	3.5	6	1	17	4	7	2	0.4811	0
Q6NZI2	Polymerase I and transcript release factor	3	3	3	3	4	17	0	6	2	0.6228	2
P17655	Calpain-2 catalytic subunit	2	0	1	0	0	8	0	2	2	0.7842	2
Q9NZN4	EH domain-containing protein 2	1	1	1	2	2	3	1	2	2	0.1336	0
P47813	Eukaryotic translation initiation factor 1A, X-chromosomal	1	1	1	0	1	4	3	2	2	0.6228	0
O14602	Eukaryotic translation initiation factor 1A, Y-chromosomal	1	1	1	0	1	4	3	2	2	0.6228	0
Q16543	Hsp90 co-chaperone Cdc37	1	1	1	3	0	5	0	2	2	1	3
P33176	Kinesin-1 heavy chain	1	1	1	0	0	8	0	2	2	0.3173	0
Q14914	Prostaglandin reductase 1	1	1	1	0	0	8	0	2	2	0.3173	0
Q9UL46	Proteasome activator complex subunit 2	1	1	1	0	4	2	2	2	2	0.3404	0
P22061	Protein-L-isoaspartate(D-aspartate)	1	0	0.5	0	1	3	0	1	2	0.8026	3
Q9Y2E5	Epididymis-specific alpha-mannosidase	2	2	2	5	0	4	6	3.75	1.875	0.3476	0
P30041	Peroxiredoxin-6	3	4	3.5	3	3	20	0	6.5	1.85714	0.6228	9
P29144	Tripeptidyl-peptidase 2	3	3	3	6	0	15	1	5.5	1.83333	1	0
Q32P28	Prolyl 3-hydroxylase 1	2	1	1.5	1	0	7	3	2.75	1.83333	0.8143	0
Q01082	Spectrin beta chain, brain 1	11	11	11	16	0	63	0	19.75	1.79545	1	3
P01034	Cystatin-C	12	12	12	15	27	21	23	21.5	1.79167	0.0603	17
Q99497	Protein DJ-1	9	10	9.5	19	14	16	19	17	1.78947	0.0603	22
P07942	Laminin subunit beta-1	35	36	35.5	102	30	61	60	63.25	1.78169	0.3545	40
Q14019	Coactosin-like protein	11	11	11	10	10	40	18	19.5	1.77273	1	22
P09603	Macrophage colony-stimulating factor 1	2	2	2	1	1	5	7	3.5	1.75	1	0
Q9H3K6	BolA-like protein 2	1	1	1	0	2	3	2	1.75	1.75	0.3404	0
Q9BS40	Latexin	1	1	1	2	4	1	0	1.75	1.75	0.6228	0
P62314	Small nuclear ribonucleoprotein Sm D1	1	1	1	1	1	4	1	1.75	1.75	0.4795	0
Q14247	Src substrate cortactin	1	1	1	1	1	5	0	1.75	1.75	1	0
Q969H8	UPF0556 protein C19orf10	6	6	6	6	5	21	8	10	1.66667	0.6228	7
O15511	Actin-related protein 2/3 complex subunit 5	3	3	3	2	2	13	3	5	1.66667	0.6171	3
P19823	Inter-alpha-trypsin inhibitor heavy chain H2	3	3	3	4	1	8	7	5	1.66667	0.3476	8
Q15370	Transcription elongation factor B polypeptide 2	2	1	1.5	1	4	5	0	2.5	1.66667	0.8143	0
P16035	Metalloproteinase inhibitor 2	16	16	16	19	25	23	39	26.5	1.65625	0.0603	37
P26022	Pentraxin-related protein PTX3	14	15	14.5	26	0	40	30	24	1.65517	0.3545	39
P62269	40S ribosomal protein S18	5	5	5	8	5	13	7	8.25	1.65	0.14	4
P62913	60S ribosomal protein L11	2	2	2	5	3	2	3	3.25	1.625	0.1336	0
P61956	Small ubiquitin-related modifier 2	2	2	2	2	3	4	4	3.25	1.625	0.1336	10
Q04446	1,4-alpha-glucan-branching enzyme	3	3	3	0	1	18	0	4.75	1.58333	0.3404	2
P21399	Cytoplasmic aconitate hydratase	3	3	3	2	0	15	2	4.75	1.58333	0.3404	6
O95479	GDH/6PGL endoplasmic bifunctional protein	3	3	3	11	0	8	0	4.75	1.58333	1	0
O00410	Importin-5	4	4	4	1	0	24	0	6.25	1.5625	0.3404	2
P31949	Protein S100-A11	6	6	6	6	6	17	8	9.25	1.54167	0.2733	10
P99999	Cytochrome c	8	9	8.5	11	9	20	12	13	1.52941	0.1002	10
P28074	Proteasome subunit beta type-5	10	10	10	16	10	18	16	15	1.5	0.1336	17
Q00610	Clathrin heavy chain 1	7	7	7	3	0	37	2	10.5	1.5	0.3476	3
P39019	40S ribosomal protein S19	4	5	4.5	6	2	11	8	6.75	1.5	0.3545	2
P30050	60S ribosomal protein L12	3	3	3	5	3	6	4	4.5	1.5	0.14	0
Q13404	Ubiquitin-conjugating enzyme E2 variant 1	0	6	3	5	0	10	3	4.5	1.5	0.8143	17
P35268	60S ribosomal protein L22	2	2	2	2	3	6	1	3	1.5	0.6228	0
P46926	Glucosamine-6-phosphate isomerase 1	2	2	2	6	0	6	0	3	1.5	1	9
Q8TDQ7	Glucosamine-6-phosphate isomerase 2	2	2	2	4	1	6	1	3	1.5	1	8
Q13765	Nascent polypeptide-associated complex subunit alpha	2	2	2	4	0	4	4	3	1.5	0.3173	0
P60866	40S ribosomal protein S20	3	0	1.5	2	0	4	3	2.25	1.5	0.6336	0
P48643	T-complex protein 1 subunit epsilon	2	1	1.5	0	0	9	0	2.25	1.5	0.3252	2
P49189	4-trimethylaminobutyraldehyde dehydrogenase	1	1	1	0	0	6	0	1.5	1.5	0.3173	0
Q9NZL9	Methionine adenosyltransferase 2 subunit beta	1	1	1	3	0	2	1	1.5	1.5	0.6228	6
Q68BL7		1	1	1	0	0	2	4	1.5	1.5	1	0
P46108	Proto-oncogene C-crk	1	1	1	0	0	6	0	1.5	1.5	0.3173	3
P18669	Phosphoglycerate mutase 1	21	20	20.5	23	27	38	33	30.25	1.47561	0.0641	11
Q06830	Peroxiredoxin-1	22	22	22	33	24	50	22	32.25	1.46591	0.14	62
P23528	Cofilin-1	7	7	7	0	8	26	7	10.25	1.46429	0.6228	14
P36955	Pigment epithelium-derived factor	18	18	18	33	40	8	24	26.25	1.45833	0.3476	11
P06396	Gelsolin	34	37	35.5	45	26	90	43	51	1.43662	0.3545	30
P20618	Proteasome subunit beta type-1	14	14	14	15	6	29	30	20	1.42857	0.3476	15
P61158	Actin-related protein 3	4	3	3.5	5	0	12	3	5	1.42857	0.8143	13
Q14847	LIM and SH3 domain protein 1	3	4	3.5	3	0	15	2	5	1.42857	0.4811	7
P49721	Proteasome subunit beta type-2	6	6	6	8	6	10	10	8.5	1.41667	0.1336	6
Q9UBR2	Cathepsin Z	8	7	7.5	12	3	11	16	10.5	1.4	0.3545	22
A6NL28	Putative tropomyosin alpha-3 chain-like protein	3	2	2.5	4	2	5	3	3.5	1.4	0.3404	3
P55072	Transitional endoplasmic reticulum ATPase	32	32	32	30	10	98	41	44.75	1.39844	1	35
P24534	Elongation factor 1-beta	4	4	4	5	3	11	3	5.5	1.375	1	2
P62857	40S ribosomal protein S28	2	2	2	6	3	2	0	2.75	1.375	0.6228	0
Q92743	Serine protease HTRA1	2	2	2	2	0	6	3	2.75	1.375	0.6228	3
P60660	Myosin light polypeptide 6	11	11	11	7	7	32	14	15	1.36364	1	12
P46777	60S ribosomal protein L5	4	3	3.5	2	1	16	0	4.75	1.35714	0.3545	8
P15121	Aldose reductase	4	3	3.5	6	0	7	6	4.75	1.35714	0.3476	15
P29692	Elongation factor 1-delta	4	3	3.5	1	3	14	1	4.75	1.35714	0.4745	3
P28070	Proteasome subunit beta type-4	9	9	9	6	8	13	21	12	1.33333	1	11
P30740	Leukocyte elastase inhibitor	5	4	4.5	7	1	13	3	6	1.33333	1	6
P28072	Proteasome subunit beta type-6	3	3	3	3	4	3	6	4	1.33333	0.2733	7
P00338	L-lactate dehydrogenase A chain	9	10	9.5	14	0	27	9	12.5	1.31579	0.8143	42
P68104	Elongation factor 1-alpha 1	8	8	8	15	2	20	5	10.5	1.3125	1	38
Q5VTE0	Putative elongation factor 1-alpha-like 3	8	8	8	15	2	20	5	10.5	1.3125	1	0
Q9Y281	Cofilin-2	4	4	4	3	4	14	0	5.25	1.3125	0.6228	0
O75874	Isocitrate dehydrogenase [NADP] cytoplasmic	9	9	9	9	3	15	20	11.75	1.30556	0.6228	24
P23284	Peptidyl-prolyl cis-trans isomerase B	38	39	38.5	53	40	45	63	50.25	1.30519	0.0641	35
Q02809	Procollagen-lysine,2-oxoglutarate 5-dioxygenase 1	20	21	20.5	28	0	43	36	26.75	1.30488	0.3545	16
P51884	Lumican	22	23	22.5	24	15	32	46	29.25	1.3	0.3545	155
P62942	Peptidyl-prolyl cis-trans isomerase FKBP1A	5	5	5	3	9	8	6	6.5	1.3	0.3476	6
Q6EMK4	Vasorin	11	11	11	16	7	18	16	14.25	1.29545	0.3404	9
P50990	T-complex protein 1 subunit theta	6	6	6	11	1	19	0	7.75	1.29167	1	16
P25786	Proteasome subunit alpha type-1	13	13	13	19	9	15	24	16.75	1.28846	0.3476	15
P05067	Amyloid beta A4 protein	16	17	16.5	32	2	23	28	21.25	1.28788	0.3545	5
P53634	Dipeptidyl-peptidase 1	3	4	3.5	9	1	1	7	4.5	1.28571	1	0
Q02818	Nucleobindin-1	27	27	27	47	18	18	54	34.25	1.26852	1	39
Q09666	Neuroblast differentiation-associated protein AHNAK	7	8	7.5	6	0	32	0	9.5	1.26667	0.3476	0
O75347	Tubulin-specific chaperone A	7	8	7.5	7	9	9	13	9.5	1.26667	0.2333	6
Q9Y696	Chloride intracellular channel protein 4	11	11	11	6	9	34	6	13.75	1.25	0.3404	0
Q04760	Lactoylglutathione lyase	10	10	10	14	9	13	14	12.5	1.25	0.3404	14
P61160	Actin-related protein 2	5	5	5	7	0	13	5	6.25	1.25	0.6228	5
P46821	Microtubule-associated protein 1B	3	3	3	0	1	14	0	3.75	1.25	0.3404	0
P15374	Ubiquitin carboxyl-terminal hydrolase isozyme L3	3	3	3	3	5	6	1	3.75	1.25	0.6228	2
Q99538	Legumain	2	2	2	2	0	2	6	2.5	1.25	1	0
Q96G03	Phosphoglucomutase-2	2	2	2	0	0	6	4	2.5	1.25	1	0
Q99584	Protein S100-A13	2	2	2	4	2	4	0	2.5	1.25	0.6171	0
Q14257	Reticulocalbin-2	2	2	2	2	0	6	2	2.5	1.25	1	0
Q8NBJ7	Sulfatase-modifying factor 2	2	2	2	2	0	5	3	2.5	1.25	0.6228	3
O43399	Tumor protein D54	2	2	2	4	2	4	0	2.5	1.25	0.6171	0
Q9BZM5	NKG2D ligand 2	1	1	1	3	0	1	1	1.25	1.25	1	0
Q8NC51	Plasminogen activator inhibitor 1 RNA-binding protein	1	1	1	2	0	3	0	1.25	1.25	1	2
Q96FQ6	Protein S100-A16	1	1	1	1	0	3	1	1.25	1.25	1	2
P16083	Ribosyldihydronicotinamide dehydrogenase [quinone]	1	1	1	2	2	1	0	1.25	1.25	0.6171	0
Q9UBQ0	Vacuolar protein sorting-associated protein 29	1	1	1	1	0	3	1	1.25	1.25	1	0
P02751	Fibronectin	656	666	661	444	396	834	1598	818	1.23752	1	301
P07711	Cathepsin L1	8	9	8.5	15	0	8	19	10.5	1.23529	0.8143	13
Q96D15	Reticulocalbin-3	9	8	8.5	10	0	20	12	10.5	1.23529	0.3545	0
P35442	Thrombospondin-2	6	7	6.5	2	0	18	12	8	1.23077	1	10
P25789	Proteasome subunit alpha type-4	8	8	8	10	6	7	16	9.75	1.21875	1	0
P25787	Proteasome subunit alpha type-2	13	13	13	8	7	19	29	15.75	1.21154	1	4
P49720	Proteasome subunit beta type-3	8	8	8	8	3	13	14	9.5	1.1875	0.6228	5
P54819	Adenylate kinase 2, mitochondrial	3	5	4	5	7	3	4	4.75	1.1875	0.6336	0
Q9UKK9	ADP-sugar pyrophosphatase	4	4	4	0	7	5	7	4.75	1.1875	0.3404	7
P51149	Ras-related protein Rab-7a	4	4	4	8	1	6	4	4.75	1.1875	0.6228	0
P61247	40S ribosomal protein S3a	3	3	3	2	0	12	0	3.5	1.16667	0.3404	0
P18124	60S ribosomal protein L7	3	3	3	4	0	10	0	3.5	1.16667	1	0
P04004	Vitronectin	3	3	3	1	1	7	5	3.5	1.16667	1	0
Q15942	Zyxin	3	3	3	3	0	11	0	3.5	1.16667	0.6171	0
Q13561	Dynactin subunit 2	1	2	1.5	3	0	4	0	1.75	1.16667	1	5
Q9UMX5	Neudesin	1	2	1.5	1	0	4	2	1.75	1.16667	1	0
P35052	Glypican-1	14	14	14	33	0	16	15	16	1.14286	0.3476	11
P00492	Hypoxanthine-guanine phosphoribosyltransferase	4	3	3.5	6	3	6	1	4	1.14286	0.8116	2
P07602	Proactivator polypeptide	10	9	9.5	14	3	11	15	10.75	1.13158	0.3545	21
Q08380	Galectin-3-binding protein	59	65	62	84	58	47	90	69.75	1.125	1	83
P14625	Endoplasmin	38	38	38	58	13	64	36	42.75	1.125	1	23
Q9H299	SH3 domain-binding glutamic acid-rich-like protein 3	10	10	10	9	10	10	16	11.25	1.125	1	10
P28838	Cytosol aminopeptidase	4	4	4	8	1	6	3	4.5	1.125	1	30
P60033	CD81 antigen	2	2	2	2	2	2	3	2.25	1.125	0.4795	0
P81605	Dermcidin	2	2	2	6	1	1	1	2.25	1.125	0.3173	0
Q96C19	EF-hand domain-containing protein D2	2	2	2	2	2	5	0	2.25	1.125	1	0
P60983	Glia maturation factor beta	2	2	2	1	2	3	3	2.25	1.125	0.6171	6
P55854	Small ubiquitin-related modifier 3	2	2	2	2	3	4	0	2.25	1.125	0.6228	11
Q6EEV6	Small ubiquitin-related modifier 4	2	2	2	2	3	4	0	2.25	1.125	0.6228	0
Q16270	Insulin-like growth factor-binding protein 7	38	37	37.5	41	9	62	56	42	1.12	0.3545	17
P30101	Protein disulfide-isomerase A3	35	37	36	59	20	32	50	40.25	1.11806	1	59
P60900	Proteasome subunit alpha type-6	12	13	12.5	7	11	13	24	13.75	1.1	0.8143	13
P10599	Thioredoxin	11	11	11	10	13	17	8	12	1.09091	1	20
P05387	60S acidic ribosomal protein P2	6	6	6	5	5	12	4	6.5	1.08333	0.3404	0
Q99436	Proteasome subunit beta type-7	6	6	6	3	0	10	13	6.5	1.08333	1	5
Q9UNN8	Endothelial protein C receptor	3	3	3	7	0	0	6	3.25	1.08333	1	0
Q04837	Single-stranded DNA-binding protein, mitochondrial	3	3	3	3	1	6	3	3.25	1.08333	1	3
P22392	Nucleoside diphosphate kinase B	32	34	33	28	30	65	19	35.5	1.07576	0.3545	28
P11021	78 kDa glucose-regulated protein	79	81	80	87	43	128	85	85.75	1.07187	0.3545	69
Q9Y4K0	Lysyl oxidase homolog 2	7	7	7	6	0	9	15	7.5	1.07143	1	2
P49448	Glutamate dehydrogenase 2, mitochondrial	0	8	4	11	0	0	6	4.25	1.0625	1	0
O14737	Programmed cell death protein 5	4	4	4	6	5	5	1	4.25	1.0625	0.3404	3
Q14315	Filamin-C	45	44	44.5	49	15	118	5	46.75	1.05056	1	66
P23396	40S ribosomal protein S3	10	10	10	10	7	23	2	10.5	1.05	0.6228	8
Q53FA7	Putative quinone oxidoreductase	5	5	5	5	2	9	5	5.25	1.05	1	8
P61981	14-3-3 protein gamma	27	29	28	27	19	42	29	29.25	1.04464	1	28
P68363	Tubulin alpha-1B chain	23	23	23	17	2	61	15	23.75	1.03261	0.3476	36
Q9BQE3	Tubulin alpha-1C chain	23	23	23	17	2	61	15	23.75	1.03261	0.3476	0
P61604	10 kDa heat shock protein, mitochondrial	8	8	8	9	7	11	6	8.25	1.03125	1	8
P07237	Protein disulfide-isomerase	56	57	56.5	80	20	72	55	56.75	1.00442	1	40
Q15293	Reticulocalbin-1	14	14	14	17	4	22	13	14	1	1	18
P32119	Peroxiredoxin-2	11	11	11	10	10	15	9	11	1	0.3404	26
P28066	Proteasome subunit alpha type-5	11	10	10.5	8	5	13	16	10.5	1	1	9
P04080	Cystatin-B	9	9	9	6	13	11	6	9	1	1	9
Q8NBS9	Thioredoxin domain-containing protein 5	8	8	8	10	0	12	10	8	1	0.3404	13
P14324	Farnesyl pyrophosphate synthetase	7	7	7	4	2	10	12	7	1	1	3
P00441	Superoxide dismutase [Cu-Zn]	5	6	5.5	4	4	5	9	5.5	1	0.4745	8
Q16851	UTP--glucose-1-phosphate uridylyltransferase	5	6	5.5	6	0	14	2	5.5	1	0.8143	7
P21291	Cysteine and glycine-rich protein 1	4	4	4	5	2	9	0	4	1	1	0
Q9NQC3	Reticulon-4	4	4	4	3	2	8	3	4	1	0.3404	0
P25398	40S ribosomal protein S12	3	3	3	3	3	6	0	3	1	1	0
Q9Y678	Coatomer subunit gamma	2	2	2	0	0	8	0	2	1	0.3173	3
P28799	Granulins	4	0	2	3	0	2	3	2	1	0.8116	4
P29218	Inositol monophosphatase	2	2	2	1	4	2	1	2	1	0.6171	0
Q8WUJ3	Protein KIAA1199	2	2	2	1	0	1	6	2	1	0.3404	0
P13489	Ribonuclease inhibitor	2	2	2	3	0	4	1	2	1	1	2
P04066	Tissue alpha-L-fucosidase	2	2	2	3	0	2	3	2	1	0.6171	0
Q13442	28 kDa heat- and acid-stable phosphoprotein	1	1	1	0	3	1	0	1	1	0.6171	0
P02647	Apolipoprotein A-I	1	1	1	1	1	2	0	1	1	1	0
O95967	EGF-containing fibulin-like extracellular matrix protein 2	2	0	1	1	0	1	2	1	1	1	6
P26885	FK506-binding protein 2	1	1	1	1	1	2	0	1	1	1	0
Q96EK6	Glucosamine 6-phosphate N-acetyltransferase	1	1	1	2	1	1	0	1	1	1	0
O43505	N-acetyllactosaminide beta-1,3-N-acetylglucosaminyltransferase	1	1	1	1	1	0	2	1	1	1	0
P50897	Palmitoyl-protein thioesterase 1	1	1	1	2	0	0	2	1	1	1	0
P43034	Platelet-activating factor acetylhydrolase IB subunit alpha	1	1	1	2	0	2	0	1	1	1	4
P68402	Platelet-activating factor acetylhydrolase IB subunit beta	1	1	1	1	0	2	1	1	1	1	0
O00622	Protein CYR61	1	1	1	0	0	1	3	1	1	0.6171	0
O14907	Tax1-binding protein 3	1	1	1	1	1	2	0	1	1	1	0
P22102	Trifunctional purine biosynthetic protein adenosine-3	1	1	1	0	0	4	0	1	1	0.3173	0
Q99426	Tubulin folding cofactor B	1	1	1	2	0	2	0	1	1	1	2
P07437	Tubulin beta chain	25	26	25.5	19	1	69	12	25.25	0.990196	0.3545	32
Q15149	Plectin-1	71	72	71.5	127	14	125	15	70.25	0.982517	1	124
P62988	Ubiquitin	40	40	40	49	5	28	75	39.25	0.98125	1	21
P61769	Beta-2-microglobulin	26	26	26	24	37	11	30	25.5	0.980769	1	65
Q14697	Neutral alpha-glucosidase AB	10	12	11	11	0	18	14	10.75	0.977273	0.6434	5
Q9BTY2	Plasma alpha-L-fucosidase	11	11	11	15	0	10	18	10.75	0.977273	1	9
P31946	14-3-3 protein beta/alpha	30	32	31	25	24	41	31	30.25	0.975806	0.6434	38
P07355	Annexin A2	38	41	39.5	58	4	56	36	38.5	0.974684	1	23
P07108	Acyl-CoA-binding protein	9	9	9	5	14	11	5	8.75	0.972222	1	6
P04406	Glyceraldehyde-3-phosphate dehydrogenase	9	9	9	8	0	24	3	8.75	0.972222	0.3476	23
Q13443	Disintegrin and metalloproteinase domain-containing protein 9	8	8	8	6	4	11	10	7.75	0.96875	1	4
Q13509	Tubulin beta-3 chain	21	21	21	19	0	61	0	20	0.952381	0.3404	30
P30040	Endoplasmic reticulum protein ERp29	5	5	5	3	5	6	5	4.75	0.95	1	0
P02792	Ferritin light chain	5	5	5	2	11	3	3	4.75	0.95	0.3404	2
P30048	Thioredoxin-dependent peroxide reductase, mitochondrial	5	5	5	7	5	6	1	4.75	0.95	0.6228	2
P48637	Glutathione synthetase	9	9	9	12	0	12	10	8.5	0.944444	0.3404	19
P29401	Transketolase	39	36	37.5	21	15	67	38	35.25	0.94	0.6434	109
O60568	Procollagen-lysine,2-oxoglutarate 5-dioxygenase 3	13	12	12.5	19	0	16	12	11.75	0.94	0.8143	26
P68036	Ubiquitin-conjugating enzyme E2 L3	4	4	4	2	3	8	2	3.75	0.9375	0.3404	3
Q15904	V-type proton ATPase subunit S1	4	4	4	3	4	4	4	3.75	0.9375	0.4795	0
P09211	Glutathione S-transferase P	19	20	19.5	15	16	32	10	18.25	0.935897	0.3545	9
O00299	Chloride intracellular channel protein 1	11	12	11.5	9	12	14	8	10.75	0.934783	0.8143	12
O75369	Filamin-B	32	33	32.5	60	0	57	4	30.25	0.930769	1	36
P46940	Ras GTPase-activating-like protein IQGAP1	22	21	21.5	18	0	58	4	20	0.930233	0.3545	12
P16152	Carbonyl reductase [NADPH] 1	7	7	7	6	5	12	3	6.5	0.928571	0.3476	11
P28062	Proteasome subunit beta type-8	4	3	3.5	2	4	3	4	3.25	0.928571	0.8026	4
P15531	Nucleoside diphosphate kinase A	35	37	36	31	30	55	16	33	0.916667	0.3545	32
P46781	40S ribosomal protein S9	3	3	3	5	0	6	0	2.75	0.916667	1	2
P30046	D-dopachrome decarboxylase	3	3	3	2	0	8	1	2.75	0.916667	0.3476	8
P35080	Profilin-2	3	3	3	4	2	4	1	2.75	0.916667	1	3
P35237	Serpin B6	11	11	11	11	2	19	8	10	0.909091	0.6228	18
P60709	Actin, cytoplasmic 1	103	103	103	94	24	188	68	93.5	0.907767	0.3476	339
P63261	Actin, cytoplasmic 2	103	103	103	94	24	188	68	93.5	0.907767	0.3476	0
P78417	Glutathione S-transferase omega-1	17	18	17.5	14	12	24	13	15.75	0.9	0.3545	2
O14818	Proteasome subunit alpha type-7	15	15	15	7	14	13	20	13.5	0.9	0.3476	8
P10809	60 kDa heat shock protein, mitochondrial	5	5	5	10	3	5	0	4.5	0.9	0.6228	8
P62258	14-3-3 protein epsilon	66	68	67	60	50	72	58	60	0.895522	0.3545	78
P08670	Vimentin	279	285	282	236	187	343	240	251.5	0.891844	0.3545	525
Q14974	Importin subunit beta-1	18	19	18.5	15	7	32	12	16.5	0.891892	0.3545	12
P68371	Tubulin beta-2C chain	23	23	23	20	0	62	0	20.5	0.891304	0.3404	27
P07339	Cathepsin D	13	14	13.5	12	0	10	26	12	0.888889	0.3545	56
P07195	L-lactate dehydrogenase B chain	26	26	26	25	7	32	28	23	0.884615	1	68
P25788	Proteasome subunit alpha type-3	13	13	13	11	9	11	15	11.5	0.884615	0.3404	5
P05388	60S acidic ribosomal protein P0	6	7	6.5	4	0	15	4	5.75	0.884615	0.3476	0
Q6YHK3	CD109 antigen	19	19	19	10	0	32	25	16.75	0.881579	1	3
Q9NY33	Dipeptidyl-peptidase 3	9	12	10.5	14	0	17	6	9.25	0.880952	1	10
O14786	Neuropilin-1	14	14	14	21	2	3	23	12.25	0.875	1	0
P55786	Puromycin-sensitive aminopeptidase	14	14	14	20	1	20	8	12.25	0.875	1	26
O00468	Agrin	8	8	8	8	3	8	9	7	0.875	1	8
P47756	F-actin-capping protein subunit beta	8	8	8	8	4	13	3	7	0.875	0.6228	8
Q15084	Protein disulfide-isomerase A6	8	8	8	8	0	13	7	7	0.875	0.6228	12
P08758	Annexin A5	6	6	6	3	0	10	8	5.25	0.875	1	0
P49773	Histidine triad nucleotide-binding protein 1	2	2	2	2	1	3	1	1.75	0.875	0.6171	0
P48163	NADP-dependent malic enzyme	2	2	2	2	2	1	2	1.75	0.875	0.4795	0
Q9Y646	Plasma glutamate carboxypeptidase	2	2	2	5	0	0	2	1.75	0.875	0.6171	2
P62318	Small nuclear ribonucleoprotein Sm D3	2	2	2	0	2	4	1	1.75	0.875	0.6228	2
P06733	Alpha-enolase	107	111	109	101	40	169	69	94.75	0.869266	0.3545	162
P09382	Galectin-1	34	35	34.5	21	22	56	21	30	0.869565	0.3476	71
P34932	Heat shock 70 kDa protein 4	21	21	21	26	2	29	16	18.25	0.869048	1	35
P01008	Antithrombin-III	23	25	24	26	7	23	27	20.75	0.864583	0.8143	23
P14550	Alcohol dehydrogenase [NADP+]	7	7	7	7	0	12	5	6	0.857143	0.6228	8
P47755	F-actin-capping protein subunit alpha-2	3	4	3.5	3	0	7	2	3	0.857143	0.4811	0
Q92626	Peroxidasin homolog	19	19	19	10	0	35	20	16.25	0.855263	1	3
P68032	Actin, alpha cardiac muscle 1	71	73	72	62	15	122	47	61.5	0.854167	0.3545	260
P68133	Actin, alpha skeletal muscle	71	73	72	62	15	122	47	61.5	0.854167	0.3545	0
P40925	Malate dehydrogenase, cytoplasmic	13	14	13.5	13	4	17	12	11.5	0.851852	0.4811	27
Q16881	Thioredoxin reductase 1, cytoplasmic	15	15	15	16	0	21	14	12.75	0.85	1	23
P04083	Annexin A1	5	5	5	4	0	9	4	4.25	0.85	0.3404	0
P06744	Glucose-6-phosphate isomerase	35	38	36.5	54	12	32	26	31	0.849315	0.3545	70
P22626	Heterogeneous nuclear ribonucleoproteins A2/B1	13	12	12.5	9	4	14	15	10.5	0.84	1	67
Q9Y617	Phosphoserine aminotransferase	19	18	18.5	19	6	18	19	15.5	0.837838	0.8026	19
P30520	Adenylosuccinate synthetase isozyme 2	3	3	3	3	0	4	3	2.5	0.833333	1	0
Q8NCW5	Apolipoprotein A-I-binding protein	3	3	3	3	3	3	1	2.5	0.833333	0.4795	0
O76003	Glutaredoxin-3	3	3	3	3	0	5	2	2.5	0.833333	0.6228	0
P34059	N-acetylgalactosamine-6-sulfatase	3	3	3	5	0	1	4	2.5	0.833333	1	0
Q99536	Synaptic vesicle membrane protein VAT-1 homolog	3	3	3	3	0	7	0	2.5	0.833333	0.6171	7
P17987	T-complex protein 1 subunit alpha	3	3	3	2	0	8	0	2.5	0.833333	0.3404	6
O95881	Thioredoxin domain-containing protein 12	3	3	3	0	2	8	0	2.5	0.833333	0.3404	0
P58546	Myotrophin	7	7	7	4	8	8	3	5.75	0.821429	1	11
P37837	Transaldolase	17	19	18	22	9	17	11	14.75	0.819444	0.4811	40
P17096	High mobility group protein HMG-I/HMG-Y	11	11	11	7	16	4	9	9	0.818182	0.3476	0
Q71U36	Tubulin alpha-1A chain	23	23	23	17	2	56	0	18.75	0.815217	0.3476	35
P52209	6-phosphogluconate dehydrogenase, decarboxylating	18	17	17.5	16	3	23	15	14.25	0.814286	0.3545	9
P62826	GTP-binding nuclear protein Ran	4	4	4	3	3	4	3	3.25	0.8125	0.1138	14
Q15436	Protein transport protein Sec23A	4	4	4	2	0	7	4	3.25	0.8125	0.6228	5
P50454	Serpin H1	4	4	4	5	0	8	0	3.25	0.8125	1	8
P14314	Glucosidase 2 subunit beta	17	17	17	14	3	21	17	13.75	0.808824	0.6228	16
P07737	Profilin-1	63	67	65	39	38	92	41	52.5	0.807692	0.3545	60
P30086	Phosphatidylethanolamine-binding protein 1	20	20	20	15	10	25	14	16	0.8	0.3476	18
P10646	Tissue factor pathway inhibitor	6	6	6	6	0	4	9	4.75	0.791667	0.6228	0
P08865	40S ribosomal protein SA	14	14	14	17	6	13	8	11	0.785714	0.3476	9
P63241	Eukaryotic translation initiation factor 5A-1	13	15	14	11	5	23	5	11	0.785714	0.3476	0
P13497	Bone morphogenetic protein 1	3	4	3.5	1	1	5	4	2.75	0.785714	0.8116	0
P01344	Insulin-like growth factor II	4	3	3.5	1	3	0	7	2.75	0.785714	0.4811	0
P10768	S-formylglutathione hydrolase	3	4	3.5	4	0	5	2	2.75	0.785714	0.8143	7
P67936	Tropomyosin alpha-4 chain	47	49	48	29	19	44	58	37.5	0.78125	0.3545	48
P26038	Moesin	99	101	100	77	23	156	56	78	0.78	0.3545	97
Q15113	Procollagen C-endopeptidase enhancer 1	9	9	9	9	10	2	7	7	0.777778	0.6228	13
P41250	Glycyl-tRNA synthetase	10	10	10	7	0	20	4	7.75	0.775	0.3476	7
P63104	14-3-3 protein zeta/delta	48	50	49	34	32	47	38	37.75	0.770408	0.0641	42
P63244	Guanine nucleotide-binding protein subunit beta-2-like 1	13	13	13	13	0	19	8	10	0.769231	0.6228	6
P04075	Fructose-bisphosphate aldolase A	46	46	46	39	9	64	28	35	0.76087	0.3476	87
Q13813	Spectrin alpha chain, brain	58	60	59	47	0	127	3	44.25	0.75	0.3545	37
P26641	Elongation factor 1-gamma	22	22	22	13	11	30	12	16.5	0.75	0.3476	17
Q04917	14-3-3 protein eta	20	22	21	13	15	19	16	15.75	0.75	0.0641	9
P12081	Histidyl-tRNA synthetase, cytoplasmic	10	10	10	12	1	10	7	7.5	0.75	0.6228	8
O14773	Tripeptidyl-peptidase 1	6	6	6	3	0	3	12	4.5	0.75	0.3404	12
P30044	Peroxiredoxin-5, mitochondrial	5	5	5	2	2	9	2	3.75	0.75	0.3173	5
O75436	Vacuolar protein sorting-associated protein 26A	5	5	5	6	0	9	0	3.75	0.75	1	6
P53621	Coatomer subunit alpha	4	4	4	0	0	12	0	3	0.75	0.3173	6
P55884	Eukaryotic translation initiation factor 3 subunit B	4	4	4	1	0	8	3	3	0.75	0.3476	2
P10619	Lysosomal protective protein	4	4	4	3	2	3	4	3	0.75	0.1336	13
Q12884	Seprase	4	4	4	0	0	0	12	3	0.75	0.3173	0
O75390	Citrate synthase, mitochondrial	3	3	3	6	0	2	1	2.25	0.75	0.3476	2
Q9NQW7	Xaa-Pro aminopeptidase 1	3	3	3	0	0	9	0	2.25	0.75	0.3173	3
P35613	Basigin	2	2	2	1	1	2	2	1.5	0.75	0.2636	0
Q96PD2	Discoidin, CUB and LCCL domain-containing protein 2	2	2	2	0	0	6	0	1.5	0.75	0.3173	0
Q9BYT8	Neurolysin, mitochondrial	2	2	2	3	0	3	0	1.5	0.75	1	4
Q15257	Serine/threonine-protein phosphatase 2A regulatory subunit B&#039;	2	2	2	1	0	5	0	1.5	0.75	0.3404	6
Q9Y3F4	Serine-threonine kinase receptor-associated protein	2	2	2	2	0	4	0	1.5	0.75	0.6171	0
Q99523	Sortilin	2	2	2	1	0	2	3	1.5	0.75	0.6228	0
P52888	Thimet oligopeptidase	2	2	2	2	0	3	1	1.5	0.75	0.6228	3
Q15631	Translin	2	2	2	1	0	4	1	1.5	0.75	0.3404	4
P60842	Eukaryotic initiation factor 4A-I	17	18	17.5	14	0	24	14	13	0.742857	0.3476	13
P27348	14-3-3 protein theta	23	25	24	17	15	22	17	17.75	0.739583	0.0603	21
P35241	Radixin	34	35	34.5	30	6	50	15	25.25	0.731884	0.3545	43
P50395	Rab GDP dissociation inhibitor beta	47	48	47.5	36	12	54	37	34.75	0.731579	0.3545	24
P02461	Collagen alpha-1(III) chain	20	20	20	9	14	12	23	14.5	0.725	0.3476	43
P22314	Ubiquitin-like modifier-activating enzyme 1	25	25	25	22	0	42	8	18	0.72	0.3476	15
P13667	Protein disulfide-isomerase A4	29	29	29	33	3	32	15	20.75	0.715517	1	22
P43251	Biotinidase	7	7	7	4	0	3	13	5	0.714286	0.3476	3
P15311	Ezrin	34	34	34	34	0	49	14	24.25	0.713235	0.6228	51
P62937	Peptidyl-prolyl cis-trans isomerase A	57	63	60	36	30	58	47	42.75	0.7125	0.1649	66
P56537	Eukaryotic translation initiation factor 6	6	6	6	3	3	7	4	4.25	0.708333	0.3404	3
P52907	F-actin-capping protein subunit alpha-1	6	6	6	3	0	11	3	4.25	0.708333	0.3404	13
P07900	Heat shock protein HSP 90-alpha	89	93	91	74	32	110	40	64	0.703297	0.3545	49
P62158	Calmodulin	35	35	35	14	24	35	25	24.5	0.7	0.14	11
Q8NHP8	Putative phospholipase B-like 2	5	5	5	3	0	5	6	3.5	0.7	0.6228	4
O00560	Syntenin-1	5	5	5	3	0	5	6	3.5	0.7	0.6228	5
Q09028	Histone-binding protein RBBP4	5	0	2.5	0	0	4	3	1.75	0.7	0.6228	12
P62244	40S ribosomal protein S15a	4	4	4	3	0	8	0	2.75	0.6875	0.3404	0
P08962	CD63 antigen	4	4	4	9	0	0	2	2.75	0.6875	0.3404	0
O75503	Ceroid-lipofuscinosis neuronal protein 5	4	4	4	8	0	0	3	2.75	0.6875	0.3404	6
P60174	Triosephosphate isomerase	52	55	53.5	28	36	40	43	36.75	0.686916	0.0641	70
P61970	Nuclear transport factor 2	5	6	5.5	4	4	4	3	3.75	0.681818	0.0491	0
Q13838	Spliceosome RNA helicase BAT1	6	5	5.5	4	1	6	4	3.75	0.681818	0.2333	12
Q15907	Ras-related protein Rab-11B	7	7	7	3	2	7	7	4.75	0.678571	0.2733	0
P13639	Elongation factor 2	21	22	21.5	10	3	38	7	14.5	0.674419	0.3545	36
P15144	Aminopeptidase N	20	21	20.5	12	3	20	20	13.75	0.670732	0.14	0
O94985	Calsyntenin-1	30	32	31	21	5	23	34	20.75	0.669355	0.3545	32
P06753	Tropomyosin alpha-3 chain	42	42	42	27	13	35	37	28	0.666667	0.0603	40
Q9Y5Z4	Heme-binding protein 2	9	9	9	6	5	5	8	6	0.666667	0.0565	8
P59998	Actin-related protein 2/3 complex subunit 4	6	6	6	5	0	5	6	4	0.666667	0.1336	4
P42126	3,2-trans-enoyl-CoA isomerase, mitochondrial	3	3	3	3	3	1	1	2	0.666667	0.2636	0
P11766	Alcohol dehydrogenase class-3	3	3	3	2	0	6	0	2	0.666667	0.3404	4
Q99733	Nucleosome assembly protein 1-like 4	3	3	3	0	0	6	2	2	0.666667	0.3404	2
Q9UHV9	Prefoldin subunit 2	3	3	3	0	2	4	2	2	0.666667	0.3404	0
P43487	Ran-specific GTPase-activating protein	3	3	3	2	2	1	3	2	0.666667	0.1336	0
P63000	Ras-related C3 botulinum toxin substrate 1	3	3	3	2	0	4	2	2	0.666667	0.3404	0
P80303	Nucleobindin-2	0	3	1.5	0	0	0	4	1	0.666667	0.7842	8
P07686	Beta-hexosaminidase subunit beta	21	22	21.5	15	8	12	22	14.25	0.662791	0.2403	7
O43707	Alpha-actinin-4	215	220	217.5	187	28	199	162	144	0.662069	0.0641	138
P55058	Phospholipid transfer protein	5	5	5	1	4	0	8	3.25	0.65	0.3476	0
Q96FW1	Ubiquitin thioesterase	5	5	5	4	0	5	4	3.25	0.65	0.1336	4
P24666	Low molecular weight phosphotyrosine protein phosphatase	7	7	7	3	3	8	4	4.5	0.642857	0.3404	3
Q9Y3B8		3	4	3.5	1	1	5	2	2.25	0.642857	0.3476	9
P15151	Poliovirus receptor	9	9	9	8	0	9	6	5.75	0.638889	0.14	0
O75326	Semaphorin-7A	48	48	48	20	0	42	60	30.5	0.635417	0.3476	12
P27797	Calreticulin	52	52	52	33	10	36	53	33	0.634615	0.3476	26
P12814	Alpha-actinin-1	200	199	199.5	143	22	191	146	125.5	0.629073	0.0641	118
P23381	Tryptophanyl-tRNA synthetase, cytoplasmic	8	8	8	6	0	9	5	5	0.625	0.3476	28
P07910	Heterogeneous nuclear ribonucleoproteins C1/C2	6	6	6	5	3	7	0	3.75	0.625	0.3476	0
P33908	Mannosyl-oligosaccharide 1,2-alpha-mannosidase IA	6	6	6	5	1	1	8	3.75	0.625	0.3404	0
Q96IU4	Abhydrolase domain-containing protein 14B	4	4	4	0	3	5	2	2.5	0.625	0.3476	0
O95373	Importin-7	4	4	4	0	0	10	0	2.5	0.625	0.3173	0
P28482	Mitogen-activated protein kinase 1	4	4	4	5	0	5	0	2.5	0.625	1	0
P46783	40S ribosomal protein S10	2	2	2	0	2	3	0	1.25	0.625	0.6171	0
P07311	Acylphosphatase-1	2	2	2	2	1	2	0	1.25	0.625	0.2733	0
P62495	Eukaryotic peptide chain release factor subunit 1	2	2	2	1	0	2	2	1.25	0.625	0.2733	2
Q93063	Exostosin-2	2	2	2	2	0	1	2	1.25	0.625	0.2733	13
P11413	Glucose-6-phosphate 1-dehydrogenase	2	2	2	0	0	5	0	1.25	0.625	0.3173	16
P35754	Glutaredoxin-1	2	2	2	2	1	2	0	1.25	0.625	0.2733	0
P28161	Glutathione S-transferase Mu 2	2	2	2	1	0	2	2	1.25	0.625	0.2733	0
Q08257	Quinone oxidoreductase	2	2	2	2	0	2	1	1.25	0.625	0.2733	5
P67775	Serine/threonine-protein phosphatase 2A catalytic subunit alpha isoform	2	2	2	2	0	3	0	1.25	0.625	0.6171	0
P62714	Serine/threonine-protein phosphatase 2A catalytic subunit beta isoform	2	2	2	2	0	3	0	1.25	0.625	0.6171	3
Q9GZX9	Twisted gastrulation protein homolog 1	2	2	2	0	0	3	2	1.25	0.625	0.6171	0
P07951	Tropomyosin beta chain	37	36	36.5	21	0	37	33	22.75	0.623288	0.2403	44
P08238	Heat shock protein HSP 90-beta	98	100	99	75	21	108	42	61.5	0.621212	0.3545	59
P23526	Adenosylhomocysteinase	31	31	31	34	6	24	13	19.25	0.620968	0.3476	8
P35555	Fibrillin-1	33	35	34	17	14	28	25	21	0.617647	0.0641	15
P13798	Acylamino-acid-releasing enzyme	7	7	7	7	0	5	5	4.25	0.607143	0.1336	10
Q9HC38	Glyoxalase domain-containing protein 4	7	7	7	5	0	7	5	4.25	0.607143	0.1336	11
P13693	Translationally-controlled tumor protein	26	26	26	21	13	17	12	15.75	0.605769	0.0603	13
O75368	SH3 domain-binding glutamic acid-rich-like protein	12	12	12	6	8	11	4	7.25	0.604167	0.0603	7
P14618	Pyruvate kinase isozymes M1/M2	31	32	31.5	17	5	50	4	19	0.603175	0.3545	103
P09972	Fructose-bisphosphate aldolase C	13	12	12.5	9	0	13	8	7.5	0.6	0.2403	20
P02794	Ferritin heavy chain	10	10	10	6	13	3	2	6	0.6	0.3476	4
P11940	Polyadenylate-binding protein 1	5	5	5	5	0	7	0	3	0.6	0.6171	2
O00391	Sulfhydryl oxidase 1	76	78	77	61	17	50	56	46	0.597403	0.0641	129
P06748	Nucleophosmin	8	8	8	0	0	15	4	4.75	0.59375	0.3404	5
P11142	Heat shock cognate 71 kDa protein	105	103	104	70	15	104	55	61	0.586538	0.1649	161
P09493	Tropomyosin alpha-1 chain	33	32	32.5	20	0	28	28	19	0.584615	0.0603	39
P18206	Vinculin	98	99	98.5	59	20	141	10	57.5	0.583756	0.3545	86
Q9HCU0	Endosialin	12	12	12	7	0	10	11	7	0.583333	0.0603	15
Q9BRF8	Calcineurin-like phosphoesterase domain-containing protein 1	6	6	6	2	1	10	1	3.5	0.583333	0.3404	3
Q9BRA2	Thioredoxin domain-containing protein 17	6	6	6	0	3	7	4	3.5	0.583333	0.3476	8
P20933	N(4)-(beta-N-acetylglucosaminyl)-L-asparaginase	3	3	3	2	2	0	3	1.75	0.583333	0.1336	0
Q06323	Proteasome activator complex subunit 1	3	3	3	1	0	6	0	1.75	0.583333	0.3404	0
P52565	Rho GDP-dissociation inhibitor 1	25	24	24.5	9	16	18	14	14.25	0.581633	0.0641	15
Q8NBJ4	Golgi membrane protein 1	10	10	10	7	0	5	11	5.75	0.575	0.3476	3
Q92820	Gamma-glutamyl hydrolase	34	34	34	22	0	16	40	19.5	0.573529	0.3476	5
Q8WUM4	Programmed cell death 6-interacting protein	11	10	10.5	13	0	8	3	6	0.571429	0.3545	0
P16930	Fumarylacetoacetase	4	3	3.5	4	0	3	1	2	0.571429	0.3404	3
P17174	Aspartate aminotransferase, cytoplasmic	21	22	21.5	15	5	12	17	12.25	0.569767	0.0641	11
P19105	Myosin regulatory light chain 12A	15	15	15	5	7	18	4	8.5	0.566667	0.3476	0
O14950	Myosin regulatory light chain 12B	15	15	15	5	7	18	4	8.5	0.566667	0.3476	3
O95336	6-phosphogluconolactonase	8	7	7.5	2	6	6	3	4.25	0.566667	0.0603	2
O00462	Beta-mannosidase	8	8	8	10	2	6	0	4.5	0.5625	0.3476	9
Q86VP6	Cullin-associated NEDD8-dissociated protein 1	4	4	4	0	0	9	0	2.25	0.5625	0.3173	4
P31153	S-adenosylmethionine synthetase isoform type-2	4	4	4	4	0	2	3	2.25	0.5625	0.14	15
P30153	Serine/threonine-protein phosphatase 2A 65 kDa regulatory subunit A alpha isoform	3	5	4	2	0	7	0	2.25	0.5625	0.3476	7
P12955	Xaa-Pro dipeptidase	4	4	4	4	0	2	3	2.25	0.5625	0.14	15
P00367	Glutamate dehydrogenase 1, mitochondrial	8	9	8.5	16	3	0	0	4.75	0.558824	0.3476	6
P10155	60 kDa SS-A/Ro ribonucleoprotein	4	5	4.5	2	0	5	3	2.5	0.555556	0.2403	0
Q16610	Extracellular matrix protein 1	21	21	21	13	0	11	22	11.5	0.547619	0.3476	40
Q07021	Complement component 1 Q subcomponent-binding protein, mitochondrial	6	6	6	3	3	3	4	3.25	0.541667	0.0455	3
P49589	Cysteinyl-tRNA synthetase, cytoplasmic	8	7	7.5	3	0	13	0	4	0.533333	0.3476	8
Q14118	Dystroglycan	15	16	15.5	9	2	6	16	8.25	0.532258	0.2403	3
P00505	Aspartate aminotransferase, mitochondrial	16	16	16	17	2	10	5	8.5	0.53125	0.3476	17
P09622	Dihydrolipoyl dehydrogenase, mitochondrial	8	8	8	6	3	3	5	4.25	0.53125	0.0565	14
P30530	Tyrosine-protein kinase receptor UF	8	8	8	4	2	2	9	4.25	0.53125	0.3404	2
P09486	SPARC	72	77	74.5	37	8	50	62	39.25	0.526846	0.0641	84
P09651	Heterogeneous nuclear ribonucleoprotein A1	19	19	19	10	2	16	12	10	0.526316	0.0603	16
P0C7M2	Putative heterogeneous nuclear ribonucleoprotein A1-like protein 3	19	19	19	10	2	16	12	10	0.526316	0.0603	0
P00558	Phosphoglycerate kinase 1	62	64	63	41	11	42	38	33	0.52381	0.0641	122
Q01995	Transgelin	55	55	55	25	8	65	16	28.5	0.518182	0.3476	25
P17066	Heat shock 70 kDa protein 6	16	17	16.5	11	0	16	7	8.5	0.515152	0.1002	27
P31150	Rab GDP dissociation inhibitor alpha	37	36	36.5	19	9	31	16	18.75	0.513699	0.0641	27
P37802	Transgelin-2	30	30	30	13	18	20	10	15.25	0.508333	0.0603	32
Q9BRK3	Matrix-remodeling-associated protein 8	9	9	9	7	0	1	10	4.5	0.5	0.3476	4
Q14766	Latent-transforming growth factor beta-binding protein 1	8	8	8	5	0	6	5	4	0.5	0.0565	4
Q96QK1	Vacuolar protein sorting-associated protein 35	8	8	8	4	0	10	2	4	0.5	0.3476	2
P51858	Hepatoma-derived growth factor	4	4	4	0	2	2	4	2	0.5	0.1336	14
Q5JXB2	Putative ubiquitin-conjugating enzyme E2 N-like	4	3	3.5	0	0	5	2	1.75	0.5	0.3476
P61088	Ubiquitin-conjugating enzyme E2 N	4	3	3.5	0	0	5	2	1.75	0.5	0.3476	2
P00568	Adenylate kinase isoenzyme 1	3	3	3	0	0	6	0	1.5	0.5	0.3173	4
P49588	Alanyl-tRNA synthetase, cytoplasmic	3	3	3	2	0	4	0	1.5	0.5	0.3404	6
P08294	Extracellular superoxide dismutase [Cu-Zn]	3	3	3	0	6	0	0	1.5	0.5	0.3173	0
P25391	Laminin subunit alpha-1	3	3	3	4	0	0	2	1.5	0.5	0.3404	0
Q9NZM1	Myoferlin	3	3	3	0	1	4	1	1.5	0.5	0.3404	2
Q9Y2L5	Protein TRS85 homolog	6	0	3	6	0	0	0	1.5	0.5	0.5762	0
P54578	Ubiquitin carboxyl-terminal hydrolase 14	3	3	3	3	0	3	0	1.5	0.5	0.2636	2
O95861	3&#039;(2&#039;),5&#039;-bisphosphate nucleotidase 1	2	2	2	2	0	2	0	1	0.5	0.2636	3
Q07020	60S ribosomal protein L18	2	2	2	2	1	1	0	1	0.5	0.1336	0
P07384	Calpain-1 catalytic subunit	2	2	2	0	0	4	0	1	0.5	0.3173	0
Q9BT78	C	2	2	2	2	1	1	0	1	0.5	0.1336	3
P00390	Glutathione reductase, mitochondrial	2	2	2	3	0	1	0	1	0.5	0.3404	15
Q13907	Isopentenyl-diphosphate Delta-isomerase 1	2	2	2	0	0	4	0	1	0.5	0.3173	0
P15586	N-acetylglucosamine-6-sulfatase	2	2	2	2	0	0	2	1	0.5	0.2636	12
O43847	Nardilysin	4	0	2	1	0	3	0	1	0.5	0.6228	0
P48739	Phosphatidylinositol transfer protein beta isoform	2	2	2	0	0	4	0	1	0.5	0.3173	3
P78330	Phosphoserine phosphatase	2	2	2	1	1	2	0	1	0.5	0.1336	4
Q9NX46	Poly(ADP-ribose) glycohydrolase ARH3	2	2	2	2	0	2	0	1	0.5	0.2636	5
P63165	Small ubiquitin-related modifier 1	2	2	2	2	2	0	0	1	0.5	0.2636	0
P63208	S-phase kinase-associated protein 1	2	2	2	1	1	2	0	1	0.5	0.1336	0
P61812	Transforming growth factor beta-2	2	2	2	4	0	0	0	1	0.5	0.3173	7
P07858	Cathepsin B	57	58	57.5	13	1	28	72	28.5	0.495652	0.3545	36
O75083	WD repeat-containing protein 1	21	22	21.5	18	2	21	0	10.25	0.476744	0.1002	17
P34931	Heat shock 70 kDa protein 1L	19	19	19	10	0	19	7	9	0.473684	0.14	35
P40926	Malate dehydrogenase, mitochondrial	32	33	32.5	20	5	25	11	15.25	0.469231	0.0641	55
Q9ULV4	Coronin-1C	7	9	8	3	0	10	2	3.75	0.46875	0.3545	5
Q13740	CD166 antigen	47	47	47	22	1	39	26	22	0.468085	0.0603	0
Q9NWV4	UPF0587 protein C1orf123	6	7	6.5	0	5	4	3	3	0.461538	0.0641	0
O75882	Attractin	6	6	6	6	1	1	3	2.75	0.458333	0.1336	4
P20962	Parathymosin	5	6	5.5	0	4	2	4	2.5	0.454545	0.0603	2
P12109	Collagen alpha-1(VI) chain	109	109	109	43	7	76	72	49.5	0.454128	0.0603	136
Q16658	Fascin	16	16	16	11	3	9	6	7.25	0.453125	0.0603	67
P19338	Nucleolin	16	15	15.5	0	2	19	7	7	0.451613	0.3545	6
P27695	DNA-(apurinic or apyrimidinic site) lyase	5	5	5	1	3	4	1	2.25	0.45	0.0565	21
P08123	Collagen alpha-2(I) chain	141	141	141	28	16	76	130	62.5	0.443262	0.0603	406
Q12841	Follistatin-related protein 1	34	36	35	19	6	17	20	15.5	0.442857	0.0641	79
Q99798	Aconitate hydratase, mitochondrial	8	9	8.5	7	0	4	4	3.75	0.441176	0.0603	3
P38159	Heterogeneous nuclear ribonucleoprotein G	4	4	4	2	4	0	1	1.75	0.4375	0.14	8
Q99729	Heterogeneous nuclear ribonucleoprotein A/B	3	4	3.5	0	0	2	4	1.5	0.428571	0.2333	2
P67809	Nuclease-sensitive element-binding protein 1	13	13	13	15	1	3	3	5.5	0.423077	0.3404	19
P09936	Ubiquitin carboxyl-terminal hydrolase isozyme L1	24	27	25.5	7	10	19	7	10.75	0.421569	0.0603	32
P26639	Threonyl-tRNA synthetase, cytoplasmic	14	16	15	10	0	13	2	6.25	0.416667	0.0641	11
Q9UBQ6	Exostosin-like 2	3	3	3	3	0	0	2	1.25	0.416667	0.1336
Q99873	Protein arginine N-methyltransferase 1	3	3	3	1	0	4	0	1.25	0.416667	0.3404	7
Q9Y5S9	RNA-binding protein 8A	3	3	3	1	1	1	2	1.25	0.416667	0.0455	3
O43396	Thioredoxin-like protein 1	3	3	3	3	0	2	0	1.25	0.416667	0.1336	4
P02452	Collagen alpha-1(I) chain	172	175	173.5	31	11	63	184	72.25	0.416427	0.3545	160
P08253	72 kDa type IV collagenase	59	59	59	16	21	15	45	24.25	0.411017	0.0603	59
O14498	Immunoglobulin superfamily containing leucine-rich repeat protein	24	26	25	10	14	4	13	10.25	0.41	0.0641	5
P23142	Fibulin-1	55	56	55.5	18	28	23	22	22.75	0.40991	0.0641	83
O00148	ATP-dependent RNA helicase DDX39	6	5	5.5	4	1	0	4	2.25	0.409091	0.0603	0
O14579	Coatomer subunit epsilon	5	6	5.5	2	0	7	0	2.25	0.409091	0.3476	5
P08107	Heat shock 70 kDa protein 1	27	27	27	10	4	24	6	11	0.407407	0.0603	37
P06865	Beta-hexosaminidase subunit alpha	13	14	13.5	11	4	0	7	5.5	0.407407	0.0641	5
Q9Y490	Talin-1	10	10	10	0	0	16	0	4	0.4	0.3173	8
P62328	Thymosin beta-4	8	7	7.5	9	0	3	0	3	0.4	0.3476	0
Q15404	Ras suppressor protein 1	5	5	5	2	0	6	0	2	0.4	0.3404	0
P05121	Plasminogen activator inhibitor 1	723	731	727	158	4	419	554	283.75	0.390303	0.0641	472
Q9NRN5	Olfactomedin-like protein 3	4	5	4.5	1	2	0	4	1.75	0.388889	0.1002	0
Q9UJ70	N-acetyl-D-glucosamine kinase	6	6	6	0	0	7	2	2.25	0.375	0.3404	3
Q13867	Bleomycin hydrolase	4	4	4	2	0	1	3	1.5	0.375	0.0603	5
Q15691	Microtubule-associated protein RP/EB family member 1	4	4	4	0	0	4	2	1.5	0.375	0.1336	0
Q8N6G6	ADAMTS-like protein 1	2	2	2	3	0	0	0	0.75	0.375	0.3173	0
Q15417	Calponin-3	2	2	2	0	0	3	0	0.75	0.375	0.3173	0
Q14444	Caprin-1	2	2	2	1	1	1	0	0.75	0.375	0.0455	3
P07954	Fumarate hydratase, mitochondrial	2	2	2	3	0	0	0	0.75	0.375	0.3173	29
Q7Z304	MAM domain-containing protein 2	2	2	2	0	0	0	3	0.75	0.375	0.3173	0
P62820	Ras-related protein Rab-1A	2	2	2	0	0	3	0	0.75	0.375	0.3173	0
Q03405	Urokinase plasminogen activator surface receptor	2	2	2	1	0	0	2	0.75	0.375	0.1336	0
Q9UQ80	Proliferation-associated protein 2G4	20	19	19.5	15	2	6	6	7.25	0.371795	0.0603	9
Q16531	DNA damage-binding protein 1	26	29	27.5	18	0	22	0	10	0.363636	0.0603	25
P12111	Collagen alpha-3(VI) chain	245	252	248.5	55	62	68	165	87.5	0.352113	0.0641	109
Q9UBG0	C-type mannose receptor 2	5	5	5	0	0	3	4	1.75	0.35	0.0565	2
O75223	Gamma-glutamylcyclotransferase	5	5	5	2	0	3	2	1.75	0.35	0.0565	5
P42785	Lysosomal Pro-X carboxypeptidase	5	5	5	3	0	0	4	1.75	0.35	0.0565	0
P13797	Plastin-3	41	41	41	7	0	36	13	14	0.341463	0.0603	6
Q9NTK5	Obg-like ATPase 1	6	6	6	2	0	4	2	2	0.333333	0.0565	7
P62993	Growth factor receptor-bound protein 2	3	3	3	1	0	3	0	1	0.333333	0.1336	0
P62136	Serine/threonine-protein phosphatase PP1-alpha catalytic subunit	3	3	3	1	0	3	0	1	0.333333	0.1336	0
Q01105	Protein SET	16	16	16	4	2	6	9	5.25	0.328125	0.0603	3
P16070	CD44 antigen	15	16	15.5	3	0	6	11	5	0.322581	0.0641	9
Q01518	Adenylyl cyclase-associated protein 1	7	7	7	3	0	6	0	2.25	0.321429	0.0565	8
Q16555	Dihydropyrimidinase-related protein 2	13	11	12	0	0	14	1	3.75	0.3125	0.3476	35
P16949	Stathmin	12	13	12.5	0	4	2	9	3.75	0.3	0.0641	9
P36871	Phosphoglucomutase-1	5	5	5	1	0	5	0	1.5	0.3	0.1336	16
P48147	Prolyl endopeptidase	2	3	2.5	0	0	3	0	0.75	0.3	0.2113	3
Q9NZ08	Endoplasmic reticulum aminopeptidase 1	21	21	21	5	0	4	16	6.25	0.297619	0.0603	0
Q9Y240	C-type lectin domain family 11 member A	20	20	20	3	0	3	17	5.75	0.2875	0.0565	18
P0C0S8	Histone H2A type 1	9	9	9	7	2	1	0	2.5	0.277778	0.0603	0
Q9Y3C6	Peptidyl-prolyl cis-trans isomerase-like 1	5	4	4.5	0	1	2	2	1.25	0.277778	0.0603	2
P55287	Cadherin-11	11	11	11	6	0	1	5	3	0.272727	0.0603	6
P10909	Clusterin	17	19	18	4	4	1	10	4.75	0.263889	0.0603	18
P05997	Collagen alpha-2(V) chain	12	13	12.5	0	0	9	4	3.25	0.26	0.0603	20
P12110	Collagen alpha-2(VI) chain	46	45	45.5	12	3	15	17	11.75	0.258242	0.0641	36
P20908	Collagen alpha-1(V) chain	40	42	41	1	6	10	24	10.25	0.25	0.0641	5
Q8WVQ1	Soluble calcium-activated nucleotidase 1	8	8	8	1	1	0	6	2	0.25	0.0565	0
Q9NRX4	14 kDa phosphohistidine phosphatase	5	5	5	0	3	2	0	1.25	0.25	0.0565	0
Q8NCC3	Group XV phospholipase A2	5	5	5	0	0	3	2	1.25	0.25	0.0565	0
Q05682	Caldesmon	5	5	5	2	0	3	0	1.25	0.25	0.0565	9
O60888	Protein CutA	5	5	5	1	2	2	0	1.25	0.25	0.0565	0
P35318	ADM	4	4	4	3	0	0	1	1	0.25	0.0565	0
Q14764	Major vault protein	4	4	4	4	0	0	0	1	0.25	0.1138	0
O95865	N(G),N(G)-dimethylarginine dimethylaminohydrolase 2	4	4	4	0	0	3	1	1	0.25	0.0565	0
P06454	Prothymosin alpha	4	4	4	1	2	0	1	1	0.25	0.0565	2
P31937	3-hydroxyisobutyrate dehydrogenase, mitochondrial	3	3	3	1	1	0	1	0.75	0.25	0.0455	9
Q13185	Chromobox protein homolog 3	3	3	3	0	0	1	2	0.75	0.25	0.0565	5
P18462	HLA class I histocompatibility antigen, A-25 alpha chain	3	3	3	0	0	0	3	0.75	0.25	0.1138	0
P24593	Insulin-like growth factor-binding protein 5	3	3	3	0	3	0	0	0.75	0.25	0.1138	39
Q9P0L0	Vesicle-associated membrane protein-associated protein A	3	3	3	0	2	1	0	0.75	0.25	0.0565	0
Q92484	Acid sphingomyelinase-like phosphodiesterase 3a	2	2	2	2	0	0	0	0.5	0.25	0.1138	3
Q8TEA8	D-tyrosyl-tRNA(Tyr) deacylase 1	2	2	2	1	0	1	0	0.5	0.25	0.0528	0
P28065	Proteasome subunit beta type-9	2	2	2	0	0	0	2	0.5	0.25	0.1138	2
P55145	Protein ARMET	2	2	2	0	0	2	0	0.5	0.25	0.1138	0
Q6NW40	RGM domain family member B	2	2	2	0	0	0	2	0.5	0.25	0.1138	0
P49746	Thrombospondin-3	2	2	2	1	1	0	0	0.5	0.25	0.0528	0
P21333	Filamin-A	182	184	183	56	14	96	12	44.5	0.243169	0.0641	64
P55290	Cadherin-13	9	8	8.5	1	1	0	6	2	0.235294	0.0603	4
P50502	Hsc70-interacting protein	9	8	8.5	3	1	4	0	2	0.235294	0.0641	7
Q8IZP2	Protein FAM10A4	9	8	8.5	3	1	4	0	2	0.235294	0.0641	0
P63010	AP-2 complex subunit beta-1	7	8	7.5	0	1	6	0	1.75	0.233333	0.0603	3
Q6UVK1	Chondroitin sulfate proteoglycan 4	82	84	83	23	6	28	18	18.75	0.225904	0.0641	10
Q9Y6C2	EMILIN-1	10	10	10	1	0	0	8	2.25	0.225	0.0565	13
Q14103	Heterogeneous nuclear ribonucleoprotein D0	10	10	10	3	0	4	2	2.25	0.225	0.0603	7
P62807	Histone H2B type 1-C/E/F/G/I	6	6	6	3	1	1	0	1.25	0.208333	0.0565	0
P35579	Myosin-9	40	40	40	8	1	23	1	8.25	0.20625	0.0565	15
P01130	Low-density lipoprotein receptor	11	11	11	1	0	3	5	2.25	0.204545	0.0603	0
O15230	Laminin subunit alpha-5	15	12	13.5	0	0	6	5	2.75	0.203704	0.0603	0
P09429	High mobility group protein B1	18	19	18.5	2	7	1	5	3.75	0.202703	0.0641	0
O15067	Phosphoribosylformylglycinamidine synthase	9	9	9	4	0	2	1	1.75	0.194444	0.0603	8
P21810	Biglycan	63	64	63.5	7	0	4	38	12.25	0.192913	0.0641	32
Q12905	Interleukin enhancer-binding factor 2	10	11	10.5	3	0	3	2	2	0.190476	0.0603	11
P50452	Serpin B8	4	4	4	0	0	3	0	0.75	0.1875	0.0455	0
P02545	Lamin-A/C	42	42	42	7	15	9	0	7.75	0.184524	0.0603	106
P19022	Cadherin-2	27	26	26.5	4	0	3	12	4.75	0.179245	0.0641	4
Q9UBP4	Dickkopf-related protein 3	4	5	4.5	0	0	0	3	0.75	0.166667	0.0491	63
P13987	CD59 glycoprotein	3	3	3	0	0	0	2	0.5	0.166667	0.0455	0
Q9NR12	PDZ and LIM domain protein 7	3	3	3	1	0	1	0	0.5	0.166667	0.0528	0
P31948	Stress-induced-phosphoprotein 1	3	3	3	0	0	2	0	0.5	0.166667	0.0455	20
Q12906	Interleukin enhancer-binding factor 3	11	11	11	0	0	6	1	1.75	0.159091	0.0565	7
Q9UI42	Carboxypeptidase A4	31	32	31.5	8	0	6	6	5	0.15873	0.0603	96
P40121	Macrophage-capping protein	8	8	8	0	0	5	0	1.25	0.15625	0.0455	7
P80723	Brain acid soluble protein 1	5	5	5	2	0	1	0	0.75	0.15	0.0565	5
Q96CG8	Collagen triple helix repeat-containing protein 1	8	9	8.5	0	2	1	2	1.25	0.147059	0.0603	4
Q8WXI7	Mucin-16	0	7	3.5	0	0	2	0	0.5	0.142857	0.4113	0
O43776	Asparaginyl-tRNA synthetase, cytoplasmic	6	5	5.5	3	0	0	0	0.75	0.136364	0.0491	9
O95394	Phosphoacetylglucosamine mutase	5	6	5.5	0	0	3	0	0.75	0.136364	0.0491	0
P07205	Phosphoglycerate kinase 2	15	17	16	8	0	0	0	2	0.125	0.0491	0
Q15262	Receptor-type tyrosine-protein phosphatase kappa	12	12	12	0	0	0	6	1.5	0.125	0.0455	0
P54687	Branched-chain-amino-acid aminotransferase, cytosolic	6	6	6	1	0	2	0	0.75	0.125	0.0565	0
Q15819	Ubiquitin-conjugating enzyme E2 variant 2	6	6	6	0	0	0	3	0.75	0.125	0.0455	12
Q00688	FK506-binding protein 3	4	4	4	0	0	1	1	0.5	0.125	0.0528	0
P48444	Coatomer subunit delta	2	2	2	0	0	1	0	0.25	0.125	0.0455	7
Q6P587	Fumarylacetoacetate hydrolase domain-containing protein 1	2	2	2	1	0	0	0	0.25	0.125	0.0455	0
Q9H0R4	Haloacid dehalogenase-like hydrolase domain-containing protein 2	2	2	2	0	0	1	0	0.25	0.125	0.0455	0
Q00839	Heterogeneous nuclear ribonucleoprotein U	2	2	2	0	1	0	0	0.25	0.125	0.0455	0
P16403	Histone H1.2	2	2	2	0	0	1	0	0.25	0.125	0.0455	0
Q96HC4	PDZ and LIM domain protein 5	2	2	2	0	1	0	0	0.25	0.125	0.0455	2
P20062	Transcobalamin-2	2	2	2	1	0	0	0	0.25	0.125	0.0455	0
Q12792	Twinfilin-1	2	2	2	0	0	1	0	0.25	0.125	0.0455	0
O75830	Serpin I2	21	20	20.5	0	0	0	10	2.5	0.121951	0.0491	0
Q92688	Acidic leucine-rich nuclear phosphoprotein 32 family member B	8	9	8.5	0	0	2	2	1	0.117647	0.0565	3
P08243	Asparagine synthetase [glutamine-hydrolyzing]	11	12	11.5	5	0	0	0	1.25	0.108696	0.0491	0
P38646	Stress-70 protein, mitochondrial	7	7	7	2	0	1	0	0.75	0.107143	0.0565	15
P63279	SUM	5	5	5	1	0	1	0	0.5	0.1	0.0528	2
Q12907	Vesicular integral-membrane protein VIP36	5	5	5	1	0	0	1	0.5	0.1	0.0528	0
P13611	Versican core protein	11	12	11.5	0	4	0	0	1	0.0869565	0.0491	12
P84077	ADP-ribosylation factor 1	6	6	6	0	0	2	0	0.5	0.0833333	0.0455	0
P61204	ADP-ribosylation factor 3	6	6	6	0	0	2	0	0.5	0.0833333	0.0455	2
O60506	Heterogeneous nuclear ribonucleoprotein Q	6	6	6	0	0	2	0	0.5	0.0833333	0.0455	2
P05534	HLA class I histocompatibility antigen, A-24 alpha chain	6	6	6	2	0	0	0	0.5	0.0833333	0.0455	0
Q9BTT0	Acidic leucine-rich nuclear phosphoprotein 32 family member E	3	3	3	0	0	1	0	0.25	0.0833333	0.0455	0
P52926	High mobility group protein HMGI-C	3	3	3	0	0	1	0	0.25	0.0833333	0.0455	0
Q9GZT8	NIF3-like protein 1	3	3	3	0	0	1	0	0.25	0.0833333	0.0455	0
Q96A72	Protein mago nashi homolog 2	3	3	3	1	0	0	0	0.25	0.0833333	0.0455	0
P61326	Protein mago nashi homolog	3	3	3	1	0	0	0	0.25	0.0833333	0.0455	3
A8MXB0	Putative protein mago nashi homolog 3	3	3	3	1	0	0	0	0.25	0.0833333	0.0455	0
P06132	Uroporphyrinogen decarboxylase	3	3	3	0	0	0	1	0.25	0.0833333	0.0455	0
P05556	Integrin beta-1	13	13	13	0	0	4	0	1	0.0769231	0.0455	2
P12107	Collagen alpha-1(XI) chain	8	8	8	0	0	0	2	0.5	0.0625	0.0455	0
Q14126	Desmoglein-2	4	4	4	1	0	0	0	0.25	0.0625	0.0455	2
Q9HB07	UPF0160 protein MYG1, mitochondrial	5	4	4.5	1	0	0	0	0.25	0.0555556	0.0491	4
P17050	Alpha-N-acetylgalactosaminidase	5	5	5	0	0	0	1	0.25	0.05	0.0455	0
P05455	Lupus La protein	5	5	5	0	0	1	0	0.25	0.05	0.0455	7
O75635	Serpin B7	5	5	5	1	0	0	0	0.25	0.05	0.0455	6
P39687	Acidic leucine-rich nuclear phosphoprotein 32 family member A	5	6	5.5	0	0	0	1	0.25	0.0454545	0.0491	0
Q9Y266	Nuclear migration protein nudC	7	7	7	1	0	0	0	0.25	0.0357143	0.0455	3
Q13308	Tyrosine-protein kinase-like 7	10	11	10.5	0	0	0	0	0	0	NA	14
P49788	Retinoic acid receptor responder protein 1	0	0	0	100	58	4	18	45	#DIV/0!	NA	17
P0C0L5	Complement C4-B	0	0	0	48	91	17	18	43.5	#DIV/0!	NA	0
P01024	Complement C3	0	0	0	57	78	38	0	43.25	#DIV/0!	NA	120
P0C0L4	Complement C4-A	0	0	0	48	91	0	18	39.25	#DIV/0!	NA	12
P55268	Laminin subunit beta-2	0	0	0	26	10	25	6	16.75	#DIV/0!	NA	4
P05090	Apolipoprotein D	0	0	0	8	23	9	18	14.5	#DIV/0!	NA	0
Q14204	Cytoplasmic dynein 1 heavy chain 1	0	0	0	0	0	56	0	14	#DIV/0!	NA	0
Q13885	Tubulin beta-2A chain	0	0	0	0	0	53	0	13.25	#DIV/0!	NA	21
Q562R1	Beta-actin-like protein 2	0	0	0	0	0	50	0	12.5	#DIV/0!	NA	0
P36222	Chitinase-3-like protein 1	0	0	0	15	21	0	7	10.75	#DIV/0!	NA	29
P03956	Interstitial collagenase	0	0	0	43	0	0	0	10.75	#DIV/0!	NA	0
P22352	Glutathione peroxidase 3	0	0	0	6	20	10	3	9.75	#DIV/0!	NA	0
P11216	Glycogen phosphorylase, brain form	0	0	0	6	0	33	0	9.75	#DIV/0!	NA	0
Q12805	EGF-containing fibulin-like extracellular matrix protein 1	0	0	0	12	0	18	6	9	#DIV/0!	NA	42
O15144	Actin-related protein 2/3 complex subunit 2	0	0	0	9	0	21	5	8.75	#DIV/0!	NA	9
Q9BUF5	Tubulin beta-6 chain	0	0	0	0	0	32	0	8	#DIV/0!	NA	13
Q14393	Growth arrest-specific protein 6	0	0	0	0	0	18	12	7.5	#DIV/0!	NA	13
P02771	Alpha-fetoprotein	0	0	0	2	2	8	11	5.75	#DIV/0!	NA	6
Q08431	Lactadherin	0	0	0	5	0	8	8	5.25	#DIV/0!	NA	6
Q4LDE5	Sushi, von Willebrand factor type A, EGF and pentraxin domain-containing protein 1	0	0	0	6	10	3	2	5.25	#DIV/0!	NA	0
P18065	Insulin-like growth factor-binding protein 2	0	0	0	6	0	14	0	5	#DIV/0!	NA	5
P27816	Microtubule-associated protein 4	0	0	0	0	0	20	0	5	#DIV/0!	NA	0
O94919	Endonuclease domain-containing 1 protein	0	0	0	7	0	8	4	4.75	#DIV/0!	NA	0
Q6UXH9	Inactive serine protease RAMP	0	0	0	3	0	9	7	4.75	#DIV/0!	NA	0
O00469	Procollagen-lysine,2-oxoglutarate 5-dioxygenase 2	0	0	0	6	0	13	0	4.75	#DIV/0!	NA	4
P62491	Ras-related protein Rab-11A	0	0	0	3	2	7	7	4.75	#DIV/0!	NA	5
O00584	Ribonuclease T2	0	0	0	6	0	7	6	4.75	#DIV/0!	NA	0
Q96KP4	Cytosolic non-specific dipeptidase	0	0	0	0	0	18	0	4.5	#DIV/0!	NA	8
Q86UP2	Kinectin	0	0	0	0	0	17	1	4.5	#DIV/0!	NA	0
Q92954	Proteoglycan 4	0	0	0	4	9	4	1	4.5	#DIV/0!	NA	0
P40227	T-complex protein 1 subunit zeta	0	0	0	2	0	14	0	4	#DIV/0!	NA	7
P62851	40S ribosomal protein S25	0	0	0	4	3	6	2	3.75	#DIV/0!	NA	2
P62736	Actin, aortic smooth muscle	0	0	0	0	15	0	0	3.75	#DIV/0!	NA	0
P63267	Actin, gamma-enteric smooth muscle	0	0	0	0	15	0	0	3.75	#DIV/0!	NA	0
Q14116	Interleukin-18	0	0	0	4	0	11	0	3.75	#DIV/0!	NA	0
Q15121	Astrocytic phosphoprotein PEA-15	0	0	0	1	0	8	5	3.5	#DIV/0!	NA	2
O94760	N(G),N(G)-dimethylarginine dimethylaminohydrolase 1	0	0	0	6	0	4	4	3.5	#DIV/0!	NA	4
P55209	Nucleosome assembly protein 1-like 1	0	0	0	0	0	10	4	3.5	#DIV/0!	NA	0
P49368	T-complex protein 1 subunit gamma	0	0	0	4	0	10	0	3.5	#DIV/0!	NA	4
Q96AY3	FK506-binding protein 10	0	0	0	5	0	8	0	3.25	#DIV/0!	NA	9
Q7KZF4	Staphylococcal nuclease domain-containing protein 1	0	0	0	4	0	9	0	3.25	#DIV/0!	NA	8
Q02952	A-kinase anchor protein 12	0	0	0	0	0	11	1	3	#DIV/0!	NA	0
Q04828	Aldo-keto reductase family 1 member C1	0	0	0	5	1	3	3	3	#DIV/0!	NA	0
P53618	Coatomer subunit beta	0	0	0	0	0	12	0	3	#DIV/0!	NA	0
Q32P51	Heterogeneous nuclear ribonucleoprotein A1-like protein 2	0	0	0	10	2	0	0	3	#DIV/0!	NA	0
O15232	Matrilin-3	0	0	0	3	0	7	2	3	#DIV/0!	NA	0
Q9Y265	RuvB-like 1	0	0	0	4	0	8	0	3	#DIV/0!	NA	7
Q06278	Aldehyde oxidase	0	0	0	0	0	11	0	2.75	#DIV/0!	NA	0
Q06481	Amyloid-like protein 2	0	0	0	4	0	0	7	2.75	#DIV/0!	NA	0
Q15046	Lysyl-tRNA synthetase	0	0	0	0	0	11	0	2.75	#DIV/0!	NA	0
P52378	Replication origin-binding protein	0	0	0	7	4	0	0	2.75	#DIV/0!	NA	0
P52452	Replication origin-binding protein	0	0	0	7	4	0	0	2.75	#DIV/0!	NA	0
P50991	T-complex protein 1 subunit delta	0	0	0	0	0	11	0	2.75	#DIV/0!	NA	5
Q13200	26S proteasome non-ATPase regulatory subunit 2	0	0	0	2	0	8	0	2.5	#DIV/0!	NA	0
O15143	Actin-related protein 2/3 complex subunit 1B	0	0	0	3	0	7	0	2.5	#DIV/0!	NA	6
P53004	Biliverdin reductase A	0	0	0	4	1	4	1	2.5	#DIV/0!	NA	4
P35606	Coatomer subunit beta&#039;	0	0	0	1	0	9	0	2.5	#DIV/0!	NA	2
P00746	Complement factor D	0	0	0	0	5	3	2	2.5	#DIV/0!	NA	0
P10253	Lysosomal alpha-glucosidase	0	0	0	5	0	3	2	2.5	#DIV/0!	NA	3
P08493	Matrix Gla protein	0	0	0	2	4	4	0	2.5	#DIV/0!	NA	6
Q15369	Transcription elongation factor B polypeptide 1	0	0	0	6	0	4	0	2.5	#DIV/0!	NA	0
P08708	40S ribosomal protein S17	0	0	0	1	0	7	1	2.25	#DIV/0!	NA	0
P62701	40S ribosomal protein S4, X isoform	0	0	0	1	1	5	2	2.25	#DIV/0!	NA	0
P52895	Aldo-keto reductase family 1 member C2	0	0	0	5	1	3	0	2.25	#DIV/0!	NA	0
P00751	Complement factor B	0	0	0	3	3	0	3	2.25	#DIV/0!	NA	16
P01040	Cystatin-A	0	0	0	0	0	4	5	2.25	#DIV/0!	NA	0
O60664	Mannose-6-phosphate receptor-binding protein 1	0	0	0	5	0	4	0	2.25	#DIV/0!	NA	0
P48681	Nestin	0	0	0	1	0	6	2	2.25	#DIV/0!	NA	0
Q13219	Pappalysin-1	0	0	0	0	0	8	1	2.25	#DIV/0!	NA	10
O00151	PDZ and LIM domain protein 1	0	0	0	2	0	7	0	2.25	#DIV/0!	NA	5
Q12765	Secernin-1	0	0	0	1	0	6	2	2.25	#DIV/0!	NA	0
O60687	Sushi repeat-containing protein SRPX2	0	0	0	0	0	5	4	2.25	#DIV/0!	NA	0
Q99460	26S proteasome non-ATPase regulatory subunit 1	0	0	0	1	0	7	0	2	#DIV/0!	NA	2
P62424	60S ribosomal protein L7a	0	0	0	3	0	5	0	2	#DIV/0!	NA	0
P01011	Alpha-1-antichymotrypsin	0	0	0	0	8	0	0	2	#DIV/0!	NA	0
P04632	Calpain small subunit 1	0	0	0	0	1	7	0	2	#DIV/0!	NA	2
P39059	Collagen alpha-1(XV) chain	0	0	0	0	8	0	0	2	#DIV/0!	NA	0
Q16643	Drebrin	0	0	0	0	0	8	0	2	#DIV/0!	NA	0
Q14203	Dynactin subunit 1	0	0	0	0	0	8	0	2	#DIV/0!	NA	0
P19367	Hexokinase-1	0	0	0	0	0	8	0	2	#DIV/0!	NA	0
P41252	Isoleucyl-tRNA synthetase, cytoplasmic	0	0	0	0	0	8	0	2	#DIV/0!	NA	2
O60462	Neuropilin-2	0	0	0	4	0	0	4	2	#DIV/0!	NA	0
Q96TA1	Niban-like protein 1	0	0	0	2	0	6	0	2	#DIV/0!	NA	0
P98179	Putative RNA-binding protein 3	0	0	0	0	0	5	3	2	#DIV/0!	NA	3
Q8IX30	Signal peptide, CUB and EGF-like domain-containing protein 3	0	0	0	0	0	8	0	2	#DIV/0!	NA	0
Q9UNM6	26S proteasome non-ATPase regulatory subunit 13	0	0	0	1	0	6	0	1.75	#DIV/0!	NA	0
P61163	Alpha-centractin	0	0	0	0	0	6	1	1.75	#DIV/0!	NA	3
P15291	Beta-1,4-galactosyltransferase 1	0	0	0	0	0	6	1	1.75	#DIV/0!	NA	0
P13716	Delta-aminolevulinic acid dehydratase	0	0	0	0	0	4	3	1.75	#DIV/0!	NA	0
Q96HE7	ER	0	0	0	2	0	5	0	1.75	#DIV/0!	NA	0
Q16576	Histone-binding protein RBBP7	0	0	0	0	0	4	3	1.75	#DIV/0!	NA	0
P38571	Lysosomal acid lipase/cholesteryl ester hydrolase	0	0	0	3	0	4	0	1.75	#DIV/0!	NA	0
Q13126	S-methyl-5&#039;-thioadenosine phosphorylase	0	0	0	3	0	4	0	1.75	#DIV/0!	NA	0
P19623	Spermidine synthase	0	0	0	3	0	4	0	1.75	#DIV/0!	NA	4
Q9P246	Stromal interaction molecule 2	0	0	0	7	0	0	0	1.75	#DIV/0!	NA	0
P78539	Sushi repeat-containing protein SRPX	0	0	0	4	0	0	3	1.75	#DIV/0!	NA	2
Q99832	T-complex protein 1 subunit eta	0	0	0	0	0	7	0	1.75	#DIV/0!	NA	5
P05452	Tetranectin	0	0	0	0	4	3	0	1.75	#DIV/0!	NA	3
O00231	26S proteasome non-ATPase regulatory subunit 11	0	0	0	3	0	3	0	1.5	#DIV/0!	NA	0
Q13510	Acid ceramidase	0	0	0	2	0	3	1	1.5	#DIV/0!	NA	2
P42330	Aldo-keto reductase family 1 member C3	0	0	0	5	1	0	0	1.5	#DIV/0!	NA	0
P17516	Aldo-keto reductase family 1 member C4	0	0	0	5	1	0	0	1.5	#DIV/0!	NA	3
P01019	Angiotensinogen	0	0	0	0	6	0	0	1.5	#DIV/0!	NA	0
O95782	AP-2 complex subunit alpha-1	0	0	0	0	0	6	0	1.5	#DIV/0!	NA	7
P54136	Arginyl-tRNA synthetase, cytoplasmic	0	0	0	0	0	6	0	1.5	#DIV/0!	NA	10
P04040	Catalase	0	0	0	6	0	0	0	1.5	#DIV/0!	NA	0
P12277	Creatine kinase B-type	0	0	0	1	0	5	0	1.5	#DIV/0!	NA	0
Q96AC1	Fermitin family homolog 2	0	0	0	0	0	6	0	1.5	#DIV/0!	NA	0
Q13642	Four and a half LIM domains protein 1	0	0	0	2	1	3	0	1.5	#DIV/0!	NA	2
Q15181	Inorganic pyrophosphatase	0	0	0	2	0	4	0	1.5	#DIV/0!	NA	0
P51688	N-sulphoglucosamine sulphohydrolase	0	0	0	3	0	3	0	1.5	#DIV/0!	NA	0
Q10471	Polypeptide N-acetylgalactosaminyltransferase 2	0	0	0	5	0	1	0	1.5	#DIV/0!	NA	0
Q9NVA2	Septin-11	0	0	0	0	0	6	0	1.5	#DIV/0!	NA	14
O00487	26S proteasome non-ATPase regulatory subunit 14	0	0	0	1	0	3	1	1.25	#DIV/0!	NA	0
P62263	40S ribosomal protein S14	0	0	0	0	0	4	1	1.25	#DIV/0!	NA	0
P62241	40S ribosomal protein S8	0	0	0	1	0	4	0	1.25	#DIV/0!	NA	0
P12956	ATP-dependent DNA helicase 2 subunit 1	0	0	0	0	0	5	0	1.25	#DIV/0!	NA	3
P05156	Complement factor I	0	0	0	4	0	0	1	1.25	#DIV/0!	NA	5
P29279	Connective tissue growth factor	0	0	0	2	0	3	0	1.25	#DIV/0!	NA	2
P27105	Erythrocyte band 7 integral membrane protein	0	0	0	4	1	0	0	1.25	#DIV/0!	NA	3
Q13347	Eukaryotic translation initiation factor 3 subunit I	0	0	0	2	0	3	0	1.25	#DIV/0!	NA	4
Q16394	Exostosin-1	0	0	0	0	0	3	2	1.25	#DIV/0!	NA	4
O60763	General vesicular transport factor p115	0	0	0	0	0	5	0	1.25	#DIV/0!	NA	0
P15104	Glutamine synthetase	0	0	0	3	0	0	2	1.25	#DIV/0!	NA	0
P46976	Glycogenin-1	0	0	0	1	0	4	0	1.25	#DIV/0!	NA	0
P33778	Histone H2B type 1-B	0	0	0	3	1	1	0	1.25	#DIV/0!	NA	0
P06899	Histone H2B type 1-J	0	0	0	3	1	1	0	1.25	#DIV/0!	NA	0
P23527	Histone H2B type 1-	0	0	0	3	1	1	0	1.25	#DIV/0!	NA	0
Q16778	Histone H2B type 2-E	0	0	0	3	1	1	0	1.25	#DIV/0!	NA	0
Q8N257	Histone H2B type 3-B	0	0	0	3	1	1	0	1.25	#DIV/0!	NA	0
Q00169	Phosphatidylinositol transfer protein alpha isoform	0	0	0	0	0	5	0	1.25	#DIV/0!	NA	0
O00764	Pyridoxal kinase	0	0	0	1	0	3	1	1.25	#DIV/0!	NA	0
P02753	Retinol-binding protein 4	0	0	0	0	0	4	1	1.25	#DIV/0!	NA	0
P45974	Ubiquitin carboxyl-terminal hydrolase 5	0	0	0	1	0	4	0	1.25	#DIV/0!	NA	0
Q9NYU2	UDP-glucose:glycoprotein glucosyltransferase 1	0	0	0	2	0	3	0	1.25	#DIV/0!	NA	0
O60613	15 kDa selenoprotein	0	0	0	1	0	3	0	1	#DIV/0!	NA	0
P51665	26S proteasome non-ATPase regulatory subunit 7	0	0	0	1	0	3	0	1	#DIV/0!	NA	0
P62273	40S ribosomal protein S29	0	0	0	2	1	1	0	1	#DIV/0!	NA	0
P15289	Arylsulfatase A	0	0	0	2	0	1	1	1	#DIV/0!	NA	0
P14868	Aspartyl-tRNA synthetase, cytoplasmic	0	0	0	2	0	2	0	1	#DIV/0!	NA	6
O60869	Endothelial differentiation-related factor 1	0	0	0	0	1	2	1	1	#DIV/0!	NA	0
Q9UBX5	Fibulin-5	0	0	0	0	0	2	2	1	#DIV/0!	NA	3
Q9H488	GDP-fucose protein	0	0	0	4	0	0	0	1	#DIV/0!	NA	0
Q13630	GDP-L-fucose synthetase	0	0	0	1	0	3	0	1	#DIV/0!	NA	2
P23434	Glycine cleavage system H protein, mitochondrial	0	0	0	2	2	0	0	1	#DIV/0!	NA	0
Q9HAV7	GrpE protein homolog 1, mitochondrial	0	0	0	2	0	1	1	1	#DIV/0!	NA	0
Q9UK76	Hematological and neurological expressed 1 protein	0	0	0	1	0	1	2	1	#DIV/0!	NA	0
P13164	Interferon-induced transmembrane protein 1	0	0	0	2	1	1	0	1	#DIV/0!	NA	0
Q01629	Interferon-induced transmembrane protein 2	0	0	0	2	1	1	0	1	#DIV/0!	NA	0
Q01628	Interferon-induced transmembrane protein 3	0	0	0	2	1	1	0	1	#DIV/0!	NA	0
A6NMY6	Putative annexin A2-like protein	0	0	0	0	4	0	0	1	#DIV/0!	NA	0
P49908	Selenoprotein P	0	0	0	0	4	0	0	1	#DIV/0!	NA	0
Q9HCB6	Spondin-1	0	0	0	0	4	0	0	1	#DIV/0!	NA	0
Q99598	Translin-associated protein X	0	0	0	1	0	3	0	1	#DIV/0!	NA	0
P21589	5&#039;-nucleotidase	5	5	5	0	0	0	0	0	0	NA	0
Q8IUX7	Adipocyte enhancer-binding protein 1	3	4	3.5	0	0	0	0	0	0	NA	0
P55285	Cadherin-6	16	16	16	0	0	0	0	0	0	NA	19
Q99439	Calponin-2	2	2	2	0	0	0	0	0	0	NA	0
P16870	Carboxypeptidase E	3	3	3	0	0	0	0	0	0	NA	3
P83916	Chromobox protein homolog 1	3	3	3	0	0	0	0	0	0	NA	3
Q02388	Collagen alpha-1(VII) chain	4	4	4	0	0	0	0	0	0	NA	0
Q99715	Collagen alpha-1(XII) chain	6	6	6	0	0	0	0	0	0	NA	97
Q5KU26	Collectin-12	3	3	3	0	0	0	0	0	0	NA	2
P33316	Deoxyuridine 5&#039;-triphosphate nucleotidohydrolase	6	6	6	0	0	0	0	0	0	NA	0
P36957	Dihydrolipoyllysine-residue succinyltransferase component	3	3	3	0	0	0	0	0	0	NA	0
P09417	Dihydropteridine reductase	3	4	3.5	0	0	0	0	0	0	NA	0
Q14194	Dihydropyrimidinase-related protein 1	3	3	3	0	0	0	0	0	0	NA	13
Q14195	Dihydropyrimidinase-related protein 3	5	5	5	0	0	0	0	0	0	NA	20
Q9UHY7	Enolase-phosphatase E1	3	3	3	0	0	0	0	0	0	NA	0
P52799	Ephrin-B2	2	2	2	0	0	0	0	0	0	NA	0
P09104	Gamma-enolase	9	9	9	0	0	0	0	0	0	NA	12
P48723	Heat shock 70 kDa protein 13	0	4	2	0	0	0	0	0	0	NA	0
O15347	High mobility group protein B3	3	3	3	0	0	0	0	0	0	NA	0
P01891	HLA class I histocompatibility antigen, A-68 alpha chain	3	3	3	0	0	0	0	0	0	NA	0
P10316	HLA class I histocompatibility antigen, A-69 alpha chain	3	3	3	0	0	0	0	0	0	NA	0
P30464	HLA class I histocompatibility antigen, B-15 alpha chain	4	4	4	0	0	0	0	0	0	NA	0
P08648	Integrin alpha-5	2	2	2	0	0	0	0	0	0	NA	0
P20700	Lamin-B1	2	2	2	0	0	0	0	0	0	NA	20
Q8WWI1	LIM domain only protein 7	2	2	2	0	0	0	0	0	0	NA	0
P50281	Matrix metalloproteinase-14	3	3	3	0	0	0	0	0	0	NA	0
P24844	Myosin regulatory light polypeptide 9	12	12	12	0	0	0	0	0	0	NA	0
Q9P121	Neurotrimin	3	3	3	0	0	0	0	0	0	NA	0
Q15758	Neutral amino acid transporter B(0)	2	2	2	0	0	0	0	0	0	NA	0
O43447	Peptidyl-prolyl cis-trans isomerase H	2	2	2	0	0	0	0	0	0	NA	4
Q9H2H8	Peptidyl-prolyl cis-trans isomerase-like 3	3	3	3	0	0	0	0	0	0	NA	3
Q8IV08	Phospholipase D3	4	4	4	0	0	0	0	0	0	NA	16
Q96SM3	Probable carboxypeptidase X1	3	4	3.5	0	0	0	0	0	0	NA	0
P12004	Proliferating cell nuclear antigen	4	3	3.5	0	0	0	0	0	0	NA	13
Q8NBP7	Proprotein convertase subtilisin/kexin type 9	2	2	2	0	0	0	0	0	0	NA	0
Q9NUQ9	Protein FAM49B	2	7	4.5	0	0	0	0	0	0	NA	4
Q9P258	Protein RCC2	1	2	1.5	0	0	0	0	0	0	NA	0
P09455	Retinol-binding protein 1	3	3	3	0	0	0	0	0	0	NA	0
Q9Y6N7	Roundabout homolog 1	4	4	4	0	0	0	0	0	0	NA	0
Q13591	Semaphorin-5A	3	3	3	0	0	0	0	0	0	NA	0
Q86WD7	Serpin A9	2	2	2	0	0	0	0	0	0	NA	0
O94875	Sorbin and SH3 domain-containing protein 2	3	3	3	0	0	0	0	0	0	NA	0
Q15393	Splicing factor 3B subunit 3	2	2	2	0	0	0	0	0	0	NA	8
P18827	Syndecan-1	4	4	4	0	0	0	0	0	0	NA	0
O95407	Tumor necrosis factor receptor superfamily member 6B	2	2	2	0	0	0	0	0	0	NA	0
Q6IBS0	Twinfilin-2	4	4	4	0	0	0	0	0	0	NA	0
P26640	Valyl-tRNA synthetase	2	2	2	0	0	0	0	0	0	NA	0
B2RPK0	Putative high mobility group protein 1-like 1	0	0	0	0	0	0	0	0	#DIV/0!	NA	2
O00115	Deoxyribonuclease-2-alpha	0	0	0	0	0	0	0	0	#DIV/0!	NA	2
O00300	Tumor necrosis factor receptor superfamily member 11B	0	0	0	0	0	0	0	0	#DIV/0!	NA	11
O14672	Disintegrin and metalloproteinase domain-containing protein 10	0	0	0	0	0	0	0	0	#DIV/0!	NA	6
O14936	Peripheral plasma membrane protein CASK	0	0	0	0	0	0	0	0	#DIV/0!	NA	2
O14980	Exportin-1	0	0	0	0	0	0	0	0	#DIV/0!	NA	2
O43175	D-3-phosphoglycerate dehydrogenase	0	0	0	0	0	0	0	0	#DIV/0!	NA	2
O43390	Heterogeneous nuclear ribonucleoprotein R	0	0	0	0	0	0	0	0	#DIV/0!	NA	2
O43592	Exportin-T	0	0	0	0	0	0	0	0	#DIV/0!	NA	3
O43684	Mitotic checkpoint protein BUB3	0	0	0	0	0	0	0	0	#DIV/0!	NA	4
O60218	Aldo-keto reductase family 1 member B10	0	0	0	0	0	0	0	0	#DIV/0!	NA	10
O60812	Heterogeneous nuclear ribonucleoprotein C-like 1	0	0	0	0	0	0	0	0	#DIV/0!	NA	3
O60832	H/ACA ribonucleoprotein complex subunit 4	0	0	0	0	0	0	0	0	#DIV/0!	NA	2
O60925	Prefoldin subunit 1	0	0	0	0	0	0	0	0	#DIV/0!	NA	3
O75643	U5 small nuclear ribonucleoprotein 200 kDa helicase	0	0	0	0	0	0	0	0	#DIV/0!	NA	2
O76061	Stanniocalcin-2	0	0	0	0	0	0	0	0	#DIV/0!	NA	18
O95777	U6 snRNA-associated Sm-like protein LSm8	0	0	0	0	0	0	0	0	#DIV/0!	NA	2
O95834	Echinoderm microtubule-associated protein-like 2	0	0	0	0	0	0	0	0	#DIV/0!	NA	2
O96019	Actin-like protein 6A	0	0	0	0	0	0	0	0	#DIV/0!	NA	2
P00749	Urokinase-type plasminogen activator	0	0	0	0	0	0	0	0	#DIV/0!	NA	7
P01009	Alpha-1-antitrypsin	0	0	0	0	0	0	0	0	#DIV/0!	NA	15
P01892	HLA class I histocompatibility antigen, A-2 alpha chain	0	0	0	0	0	0	0	0	#DIV/0!	NA	6
P04350	Tubulin beta-4 chain	0	0	0	0	0	0	0	0	#DIV/0!	NA	25
P04908	Histone H2A type 1-B/E	0	0	0	0	0	0	0	0	#DIV/0!	NA	3
P05091	Aldehyde dehydrogenase, mitochondrial	0	0	0	0	0	0	0	0	#DIV/0!	NA	5
P05362	Intercellular adhesion molecule 1	0	0	0	0	0	0	0	0	#DIV/0!	NA	3
P05543	Thyroxine-binding globulin	0	0	0	0	0	0	0	0	#DIV/0!	NA	3
P06576	ATP synthase subunit beta, mitochondrial	0	0	0	0	0	0	0	0	#DIV/0!	NA	12
P06703	Protein S100-A6	0	0	0	0	0	0	0	0	#DIV/0!	NA	5
P06737	Glycogen phosphorylase, liver form	0	0	0	0	0	0	0	0	#DIV/0!	NA	2
P07196	Neurofilament light polypeptide	0	0	0	0	0	0	0	0	#DIV/0!	NA	25
P08476	Inhibin beta A chain	0	0	0	0	0	0	0	0	#DIV/0!	NA	9
P08572	Collagen alpha-2(IV) chain	0	0	0	0	0	0	0	0	#DIV/0!	NA	18
P09496	Clathrin light chain A	0	0	0	0	0	0	0	0	#DIV/0!	NA	3
P09960	Leukotriene A-4 hydrolase	0	0	0	0	0	0	0	0	#DIV/0!	NA	16
P11464	Pregnancy-specific beta-1-glycoprotein 1	0	0	0	0	0	0	0	0	#DIV/0!	NA	3
P13010	ATP-dependent DNA helicase 2 subunit 2	0	0	0	0	0	0	0	0	#DIV/0!	NA	3
P13473	Lysosome-associated membrane glycoprotein 2	0	0	0	0	0	0	0	0	#DIV/0!	NA	3
P14866	Heterogeneous nuclear ribonucleoprotein L	0	0	0	0	0	0	0	0	#DIV/0!	NA	3
P14923	Junction plakoglobin	0	0	0	0	0	0	0	0	#DIV/0!	NA	4
P15090	Fatty acid-binding protein, adipocyte	0	0	0	0	0	0	0	0	#DIV/0!	NA	4
P15924	Desmoplakin	0	0	0	0	0	0	0	0	#DIV/0!	NA	3
P17936	Insulin-like growth factor-binding protein 3	0	0	0	0	0	0	0	0	#DIV/0!	NA	10
P19320	Vascular cell adhesion protein 1	0	0	0	0	0	0	0	0	#DIV/0!	NA	11
P19883	Follistatin	0	0	0	0	0	0	0	0	#DIV/0!	NA	10
P20742	Pregnancy zone protein	0	0	0	0	0	0	0	0	#DIV/0!	NA	21
P26447	Protein S100-A4	0	0	0	0	0	0	0	0	#DIV/0!	NA	2
P26599	Polypyrimidine tract-binding protein 1	0	0	0	0	0	0	0	0	#DIV/0!	NA	4
P29508	Serpin B3	0	0	0	0	0	0	0	0	#DIV/0!	NA	3
P30042	ES1 protein homolog, mitochondrial	0	0	0	0	0	0	0	0	#DIV/0!	NA	2
P30043	Flavin reductase	0	0	0	0	0	0	0	0	#DIV/0!	NA	2
P30566	Adenylosuccinate lyase	0	0	0	0	0	0	0	0	#DIV/0!	NA	2
P30626	Sorcin	0	0	0	0	0	0	0	0	#DIV/0!	NA	3
P34897	Serine hydroxymethyltransferase, mitochondrial	0	0	0	0	0	0	0	0	#DIV/0!	NA	5
P35609	Alpha-actinin-2	0	0	0	0	0	0	0	0	#DIV/0!	NA	23
P39060	Collagen alpha-1(XVIII) chain	0	0	0	0	0	0	0	0	#DIV/0!	NA	2
P40261	Nicotinamide N-methyltransferase	0	0	0	0	0	0	0	0	#DIV/0!	NA	5
P41091	Eukaryotic translation initiation factor 2 subunit 3	0	0	0	0	0	0	0	0	#DIV/0!	NA	2
P43490	Nicotinamide phosphoribosyltransferase	0	0	0	0	0	0	0	0	#DIV/0!	NA	23
P47895	Aldehyde dehydrogenase family 1 member A3	0	0	0	0	0	0	0	0	#DIV/0!	NA	8
P48740	Mannan-binding lectin serine protease 1	0	0	0	0	0	0	0	0	#DIV/0!	NA	10
P48745	Protein NOV homolog	0	0	0	0	0	0	0	0	#DIV/0!	NA	2
P49458	Signal recognition particle 9 kDa protein	0	0	0	0	0	0	0	0	#DIV/0!	NA	3
P50895	Lutheran blood group glycoprotein	0	0	0	0	0	0	0	0	#DIV/0!	NA	4
P52758	Ribonuclease UK114	0	0	0	0	0	0	0	0	#DIV/0!	NA	3
P53611	Geranylgeranyl transferase type-2 subunit beta	0	0	0	0	0	0	0	0	#DIV/0!	NA	2
P55060	Exportin-2	0	0	0	0	0	0	0	0	#DIV/0!	NA	3
P61086	Ubiquitin-conjugating enzyme E2 K	0	0	0	0	0	0	0	0	#DIV/0!	NA	6
P61758	Prefoldin subunit 3	0	0	0	0	0	0	0	0	#DIV/0!	NA	2
P61923	Coatomer subunit zeta-1	0	0	0	0	0	0	0	0	#DIV/0!	NA	2
P61978	Heterogeneous nuclear ribonucleoprotein K	0	0	0	0	0	0	0	0	#DIV/0!	NA	2
P62873	Guanine nucleotide-binding protein G(I)/G(S)/G(T) subunit beta-1	0	0	0	0	0	0	0	0	#DIV/0!	NA	3
P78509	Reelin	0	0	0	0	0	0	0	0	#DIV/0!	NA	22
P98095	Fibulin-2	0	0	0	0	0	0	0	0	#DIV/0!	NA	5
Q00888	Pregnancy-specific beta-1-glycoprotein 4	0	0	0	0	0	0	0	0	#DIV/0!	NA	8
Q01469	Fatty acid-binding protein, epidermal	0	0	0	0	0	0	0	0	#DIV/0!	NA	6
Q02413	Desmoglein-1	0	0	0	0	0	0	0	0	#DIV/0!	NA	2
Q02790	FK506-binding protein 4	0	0	0	0	0	0	0	0	#DIV/0!	NA	9
Q03154	Aminoacylase-1	0	0	0	0	0	0	0	0	#DIV/0!	NA	2
Q03252	Lamin-B2	0	0	0	0	0	0	0	0	#DIV/0!	NA	20
Q05048	Cleavage stimulation factor 50 kDa subunit	0	0	0	0	0	0	0	0	#DIV/0!	NA	3
Q05707	Collagen alpha-1(XIV) chain	0	0	0	0	0	0	0	0	#DIV/0!	NA	12
Q08211	ATP-dependent RNA helicase A	0	0	0	0	0	0	0	0	#DIV/0!	NA	5
Q08629	Testican-1	0	0	0	0	0	0	0	0	#DIV/0!	NA	12
Q13011	Delta(3,5)-Delta(2,4)-dienoyl-CoA isomerase, mitochondrial	0	0	0	0	0	0	0	0	#DIV/0!	NA	4
Q13283	Ras GTPase-activating protein-binding protein 1	0	0	0	0	0	0	0	0	#DIV/0!	NA	2
Q13643	Four and a half LIM domains protein 3	0	0	0	0	0	0	0	0	#DIV/0!	NA	3
Q13822	Ectonucleotide pyrophosphatase/phosphodiesterase family member 2	0	0	0	0	0	0	0	0	#DIV/0!	NA	8
Q14011	Cold-inducible RNA-binding protein	0	0	0	0	0	0	0	0	#DIV/0!	NA	2
Q14192	Four and a half LIM domains protein 2	0	0	0	0	0	0	0	0	#DIV/0!	NA	4
Q14767	Latent-transforming growth factor beta-binding protein 2	0	0	0	0	0	0	0	0	#DIV/0!	NA	13
Q15019	Septin-2	0	0	0	0	0	0	0	0	#DIV/0!	NA	4
Q15063	Periostin	0	0	0	0	0	0	0	0	#DIV/0!	NA	35
Q15238	Pregnancy-specific beta-1-glycoprotein 5	0	0	0	0	0	0	0	0	#DIV/0!	NA	3
Q15818	Neuronal pentraxin-1	0	0	0	0	0	0	0	0	#DIV/0!	NA	31
Q16181	Septin-7	0	0	0	0	0	0	0	0	#DIV/0!	NA	5
Q53H82	Beta-lactamase-like protein 2	0	0	0	0	0	0	0	0	#DIV/0!	NA	4
Q5D862	Filaggrin-2	0	0	0	0	0	0	0	0	#DIV/0!	NA	3
Q5T749	Keratinocyte proline-rich protein	0	0	0	0	0	0	0	0	#DIV/0!	NA	2
Q5TFE4	5'-nucleotidase domain-containing protein 1	0	0	0	0	0	0	0	0	#DIV/0!	NA	2
Q5UIP0	Telomere-associated protein RIF1	0	0	0	0	0	0	0	0	#DIV/0!	NA	4
Q7LG56	Ribonucleoside-diphosphate reductase subunit M2 B	0	0	0	0	0	0	0	0	#DIV/0!	NA	4
Q7Z7M9	Polypeptide N-acetylgalactosaminyltransferase 5	0	0	0	0	0	0	0	0	#DIV/0!	NA	3
Q86SR1	Polypeptide N-acetylgalactosaminyltransferase 10	0	0	0	0	0	0	0	0	#DIV/0!	NA	2
Q86YZ3	Hornerin	0	0	0	0	0	0	0	0	#DIV/0!	NA	5
Q8N474	Secreted frizzled-related protein 1	0	0	0	0	0	0	0	0	#DIV/0!	NA	8
Q8WWM9	Cytoglobin	0	0	0	0	0	0	0	0	#DIV/0!	NA	4
Q92598	Heat shock protein 105 kDa	0	0	0	0	0	0	0	0	#DIV/0!	NA	7
Q92734	Protein TFG	0	0	0	0	0	0	0	0	#DIV/0!	NA	5
Q92905	COP9 signalosome complex subunit 5	0	0	0	0	0	0	0	0	#DIV/0!	NA	2
Q96CW1	AP-2 complex subunit mu-1	0	0	0	0	0	0	0	0	#DIV/0!	NA	3
Q96DG6	Carboxymethylenebutenolidase homolog	0	0	0	0	0	0	0	0	#DIV/0!	NA	2
Q96N46	Tetratricopeptide repeat protein 14	0	0	0	0	0	0	0	0	#DIV/0!	NA	2
Q96P63	Serpin B12	0	0	0	0	0	0	0	0	#DIV/0!	NA	3
Q99519	Sialidase-1	0	0	0	0	0	0	0	0	#DIV/0!	NA	2
Q99645	Epiphycan	0	0	0	0	0	0	0	0	#DIV/0!	NA	9
Q9BR76	Coronin-1B	0	0	0	0	0	0	0	0	#DIV/0!	NA	7
Q9BUD6	Spondin-2	0	0	0	0	0	0	0	0	#DIV/0!	NA	19
Q9BXS5	AP-1 complex subunit mu-1	0	0	0	0	0	0	0	0	#DIV/0!	NA	2
Q9BZK7	F-box-like/WD repeat-containing protein TBL1XR1	0	0	0	0	0	0	0	0	#DIV/0!	NA	5
Q9GZL7	Ribosome biogenesis protein WDR12	0	0	0	0	0	0	0	0	#DIV/0!	NA	3
Q9H3G5	Probable serine carboxypeptidase CPVL	0	0	0	0	0	0	0	0	#DIV/0!	NA	2
Q9H3H3	UPF0696 protein C11orf68	0	0	0	0	0	0	0	0	#DIV/0!	NA	2
Q9H4A4	Aminopeptidase B	0	0	0	0	0	0	0	0	#DIV/0!	NA	3
Q9NPH2	Inositol-3-phosphate synthase 1	0	0	0	0	0	0	0	0	#DIV/0!	NA	2
Q9NR45	Sialic acid synthase	0	0	0	0	0	0	0	0	#DIV/0!	NA	4
Q9NR99	Matrix-remodeling-associated protein 5	0	0	0	0	0	0	0	0	#DIV/0!	NA	4
Q9NRR1	Cytokine-like protein 1	0	0	0	0	0	0	0	0	#DIV/0!	NA	3
Q9NRV9	Heme-binding protein 1	0	0	0	0	0	0	0	0	#DIV/0!	NA	5
Q9P2B2	Prostaglandin F2 receptor negative regulator	0	0	0	0	0	0	0	0	#DIV/0!	NA	2
Q9P2J5	Leucyl-tRNA synthetase, cytoplasmic	0	0	0	0	0	0	0	0	#DIV/0!	NA	3
Q9UBQ7	Glyoxylate reductase/hydroxypyruvate reductase	0	0	0	0	0	0	0	0	#DIV/0!	NA	2
Q9UIJ7	GTP:AMP phosphotransferase mitochondrial	0	0	0	0	0	0	0	0	#DIV/0!	NA	3
Q9UJ72	Annexin A10	0	0	0	0	0	0	0	0	#DIV/0!	NA	11
Q9UJJ9	N-acetylglucosamine-1-phosphotransferase subunit gamma	0	0	0	0	0	0	0	0	#DIV/0!	NA	2
Q9ULA0	Aspartyl aminopeptidase	0	0	0	0	0	0	0	0	#DIV/0!	NA	4
Q9Y262	Eukaryotic translation initiation factor 3 subunit L	0	0	0	0	0	0	0	0	#DIV/0!	NA	2
Q9Y3I0	UPF0027 protein C22orf28	0	0	0	0	0	0	0	0	#DIV/0!	NA	2
Q9Y625	Glypican-6	0	0	0	0	0	0	0	0	#DIV/0!	NA	2
